# Supplementary material
Source: publisher figshare collection journal article supplement (https://sage.figshare.com/ndownloader/files/15264143)
Supplement: Supplementary file 1 [file 15264143]

Directory of PARTNERS2 Consolidated Explanatory Statements

Abbreviations  
 CES: Consolidated Explanatory Statement; ES: Explanatory Statement; CP: Care Partner; SU: Service user; MH: mental health

Source number references

- 1 Selected recovery literature (Bird, V, Leamy, M, Tew, J, et al. Fit for purpose? Validation of a conceptual framework for personal recovery with current mental health consumers. The n and New Zealand journal of psychiatry 2014.
- 2 Selected recovery literature (Bora, R, Leaning, S, Moores, A, et al. Life coaching for mental health recovery: the emerging practice of recovery coaching. Advances in Psychiatric Treatment 2010; 16: 459-67.
- 3 Selected recovery literature (CSIP, RCPsych, SCIE. A common purpose: Recovery in future mental health services. London: SCIEW (Social Care Institute for Excellence), 2007.
- 4 Selected recovery literature (Brown, W and Kandirikirira, N. Recovering mental health in Scotland. Report on narrative investigation of mental health recovery. Glasgow: Scottish Recovery Network, 2007.
- 5 Birmingham LEAP mtg October 2014
- 6 Recovery workshop August 2014
- 7 Key leader interviews
- 8 Focus groups with SUs

| Macro/Meso/Micro level                                                      | Outcome ( <i>then</i> ) category       | Context/Mechanism ( <i>if</i> ) category           | CES No. | Consolidated Candidate Theory                                                                                                                                                                                                                                                                                                                                                                                                                                                                     | ES No. | ESs                                                                                                                                                                                              | stakeholder, source number            |
|-----------------------------------------------------------------------------|----------------------------------------|----------------------------------------------------|---------|---------------------------------------------------------------------------------------------------------------------------------------------------------------------------------------------------------------------------------------------------------------------------------------------------------------------------------------------------------------------------------------------------------------------------------------------------------------------------------------------------|--------|--------------------------------------------------------------------------------------------------------------------------------------------------------------------------------------------------|---------------------------------------|
| 1. <b>Practitioner: organisational, social and cultural context (Macro)</b> | Organisational culture                 | Recovery principles for practitioners              | 1       | <p>If a central aim within PARTNERS is towards personal recovery, then there may need to be attitude change towards this aim, because established expectations within mental health care, for practitioners and potentially service users, can revolve around symptom reduction.</p> <p>If recovery principles are adopted by organisation leaders in their interactions with health care staff, then the cultural change needed to bring about recovery-oriented practice will be supported.</p> | S3     | If recovery principles are adopted by organisation leaders in their interactions with health care staff, then cultural change needed to bring about recovery-oriented practice will be supported | practitioners, 2; MH policy makers, 3 |
|                                                                             | General improvement for SUs: wellbeing | Focus on attitude change towards personal recovery |         |                                                                                                                                                                                                                                                                                                                                                                                                                                                                                                   | 204    | <u>If a central aim within PARTNERS is towards personal recovery, eg., helping the service user find his way in life beyond symptoms of severe mental illness, then there needs to be</u>        | key leader, 7                         |

| Macro/Meso/Micro level | Outcome ( <i>then</i> ) category                     | Context/Mechanism ( <i>if</i> ) category                                 | CES No. | Consolidated Candidate Theory                                                                                                                                                                                                                                                                                                            | ES No. | ESs                                                                                                                                                                                                                                                                 | stakeholder, source number |
|------------------------|------------------------------------------------------|--------------------------------------------------------------------------|---------|------------------------------------------------------------------------------------------------------------------------------------------------------------------------------------------------------------------------------------------------------------------------------------------------------------------------------------------|--------|---------------------------------------------------------------------------------------------------------------------------------------------------------------------------------------------------------------------------------------------------------------------|----------------------------|
|                        |                                                      |                                                                          |         |                                                                                                                                                                                                                                                                                                                                          |        | a real focus on bringing about an attitude change towards this aim, because established expectations within mental health care, for practitioners and potentially service users, revolve around symptom reduction.                                                  |                            |
|                        | Increased system capacity                            | Practitioners given responsibility to vary intensity of input by need    | 2       | <p>If practitioners (are given responsibility to) vary intensity of input by need, then the system can cope with more people.</p> <p>If intensity of input is restricted by availability of resources, then SUs may be redefined as having fewer needs or thresholds for access may change as a means to reduce demand for services.</p> | 255    | If practitioners (are given responsibility to) vary intensity of input by need, then system can cope with more people.                                                                                                                                              | key leader, 7              |
|                        | Changing access criteria (decreased system capacity) | Reduced access to care                                                   |         |                                                                                                                                                                                                                                                                                                                                          | 371    | If there are reduced resources then SUs may be redefined as having fewer needs or thresholds for access may change                                                                                                                                                  | SU, 8                      |
|                        | Team-based care                                      | Roles are clearly defined                                                | 3       | If practitioners who have contact with Partners (for example those within primary and secondary care) have a clear understanding of the role of the CP, then this prevents gaps and overlap.                                                                                                                                             | 163    | <p>If roles [across practitioners] are clarified, then work doesn't overlap</p> <p>If roles are clarified, then this prevents gaps</p>                                                                                                                              | key leader, 7              |
|                        | Team-based care                                      | Roles are clearly defined                                                |         |                                                                                                                                                                                                                                                                                                                                          | 233    | If roles are clear and agreed, then care can be team based.                                                                                                                                                                                                         | key leader, 7              |
|                        | Team-based care                                      | Organisational clarity that CP is responsible for care coordination      |         |                                                                                                                                                                                                                                                                                                                                          | 307    | <i>If</i> confusion around who is in charge of service users individual care is to be avoided <i>then</i> there needs to be clarity that (from an organisational perspective) the case manager/CP is responsible for coordinating care around the individual goals. | key leader, 7              |
|                        | Smoother transitions when stepping up                | CPs with mh training & qualifications support development of crisis plan | 4       | If CPs have experience of mental health practice (eg. medication) and prepare crisis plans that are detailed and clear, and Partners emergency protocols are available, then this will support quick, smooth and appropriate transitions in response to acute harm risk                                                                  | 246    | If case managers with some experience of mental health and practitioner training, particularly medication, such as nursing can support development of crisis plan, then this could ensure smooth transitions of change in intensity with need.                      | key leader, 7              |

| Macro/Meso/Micro level | Outcome ( <i>then</i> ) category      | Context/Mechanism ( <i>if</i> ) category                                           | CES No. | Consolidated Candidate Theory                                                                                                                                                                                             | ES No. | ESs                                                                                                                                                                                                                                                                                                                                                                                                                                                                                                                                                         | stakeholder, source number |
|------------------------|---------------------------------------|------------------------------------------------------------------------------------|---------|---------------------------------------------------------------------------------------------------------------------------------------------------------------------------------------------------------------------------|--------|-------------------------------------------------------------------------------------------------------------------------------------------------------------------------------------------------------------------------------------------------------------------------------------------------------------------------------------------------------------------------------------------------------------------------------------------------------------------------------------------------------------------------------------------------------------|----------------------------|
|                        | Smoother transitions when stepping up | Emergency protocols detailed and clear                                             |         |                                                                                                                                                                                                                           | 164    | If emergency protocols are detailed and clear, then instances of acute harm risk can be responded to immediately and appropriately                                                                                                                                                                                                                                                                                                                                                                                                                          | key leader, 7              |
|                        | Shared care                           | Range of individuals see role to support crisis                                    | 5       | If specialist mental health practitioners are based in primary care and provide care coordination, support for medication, psycho-social intervention, and crisis management then genuinely shared care can be delivered. | 250    | If a range of individuals (eg GP, nurse, Psychiatrist etc) are in primary care and see their role to support a crisis, then stepped up intensive care during a crisis can be created without need to transition to new service or team.                                                                                                                                                                                                                                                                                                                     | key leader, 7              |
|                        | Shared care                           | MH worker in primary care providing medication & PSI                               |         |                                                                                                                                                                                                                           | 229    | If mental health specialist support covered medication and psycho-social interventions for mental health, then team based care without need for referral can be put in place.                                                                                                                                                                                                                                                                                                                                                                               | key leader, 7              |
|                        | Shared care                           | Primary and secondary care less constrained by defining who manages each condition |         |                                                                                                                                                                                                                           | 238    | If primary and secondary care are less constrained by defining who manages which conditions, then a model can work more flexibly sharing responsibility for different groups of patients.                                                                                                                                                                                                                                                                                                                                                                   | key leader, 7              |
|                        | Shared care                           | MH practitioners co-located and accessible to primary care                         |         |                                                                                                                                                                                                                           | 257    | If specialist practitioners are co-located and directly accessible to primary care, then this increases chance of both gaining specialist input and doing genuinely shared care through a combination of face to face and written communication.                                                                                                                                                                                                                                                                                                            | key leader, 7              |
|                        | Shared care                           | Interactions between primary and secondary care                                    |         |                                                                                                                                                                                                                           | 212    | If PARTNERS created better structures for collaboration between primary and secondary care, for example by improving the quality of information available about service user needs through coordination of care by the CP, and by providing improved relationships between GPs and psychiatrists, then the GP's role would be to support the physical health of the service user, and the mental health of the service user in liaison with, and supported by, a psychiatrist. (Discussed in Nov 2015 as being about GP engagement & what will help them in | key leader, 7              |

| Macro/Meso/Micro level | Outcome ( <i>then</i> ) category                      | Context/Mechanism ( <i>if</i> ) category                                                                        | CES No. | Consolidated Candidate Theory                                                                                                                                                                                                               | ES No. | ESs                                                                                                                                                                                                                                                                                     | stakeholder, source number |
|------------------------|-------------------------------------------------------|-----------------------------------------------------------------------------------------------------------------|---------|---------------------------------------------------------------------------------------------------------------------------------------------------------------------------------------------------------------------------------------------|--------|-----------------------------------------------------------------------------------------------------------------------------------------------------------------------------------------------------------------------------------------------------------------------------------------|----------------------------|
|                        |                                                       |                                                                                                                 |         |                                                                                                                                                                                                                                             |        | actually doing the role (attention to mental and physical health) )                                                                                                                                                                                                                     |                            |
|                        | Better relationships between 1ry & 2ry care           | Co-location (of primary & secondary care)                                                                       | 6       | If secondary care workers are based in primary care and make entries in primary care notes as well as sharing information with secondary care then there will be better communication and relationships between primary and secondary care. | 247    | If collocation improves, then relationships and dynamics of system could improve                                                                                                                                                                                                        | key leader, 7              |
|                        | Better communications between 1ry & 2ry care          | CPs enter data to electronic primary are records & share with secondary care                                    |         |                                                                                                                                                                                                                                             | 356    | <i>If</i> systemic communication for P2 service users is to be effective <i>then</i> an electronic primary care notes based system of communication; with CPs entering data and sharing information electronically (with secondary care) with those who need access to it, is required. | key leader, 7              |
|                        | Better relationships between 1ry & 2ry care (barrier) | Not shared system of record keeping                                                                             |         |                                                                                                                                                                                                                                             | 201    | If there is not a shared system of record keeping between primary and secondary care during the PARTNERS intervention, then this is likely to act as a barrier to collaboration between services                                                                                        | key leader, 7              |
|                        | Links between P2 and third sector                     | Improved culture within GP practices of working with supporting access to 3 <sup>rd</sup> sector organisations. | 7       | If appropriate links between P2 and third sector organisations are to be established then GP practices must improve their culture of working with and aligning individuals with third sector organisations.                                 | 361    | If appropriate links between P2 and third sector organisations are to be established then GP practices must improve their culture of working with and aligning individuals with third sector organisations.                                                                             | key leader, 7              |
|                        | Managing risk                                         | Managing risk                                                                                                   | 8       | <i>If</i> practitioners move beyond preoccupations with risk avoidance, <i>then</i> the local area mental health team may be held accountable for any following harm done by the service user to themselves or others<br><br>but            | S59    | <i>If</i> practitioners move beyond preoccupations with risk avoidance, <i>then</i> the local area mental health team may be held accountable for any following harm done by the service user to themselves or others                                                                   | SU, 5                      |

| Macro/Meso/Micro level                                  | Outcome ( <i>then</i> ) category    | Context/Mechanism ( <i>if</i> ) category                             | CES No. | Consolidated Candidate Theory                                                                                                                                                                                                                                                         | ES No. | ESs                                                                                                                                                                                                                                                                                   | stakeholder, source number |
|---------------------------------------------------------|-------------------------------------|----------------------------------------------------------------------|---------|---------------------------------------------------------------------------------------------------------------------------------------------------------------------------------------------------------------------------------------------------------------------------------------|--------|---------------------------------------------------------------------------------------------------------------------------------------------------------------------------------------------------------------------------------------------------------------------------------------|----------------------------|
|                                                         |                                     |                                                                      |         | If supervisors had authority/experience etc, and an understanding of critical medication issues, either having psychiatry supervision of another practitioner with psychiatry back up, then the system will be and appear to be safe from a medication and risk perspective.          |        |                                                                                                                                                                                                                                                                                       |                            |
|                                                         | Managing risk                       | Supervisor skills<br>Cp-psychiatrist interactions                    |         |                                                                                                                                                                                                                                                                                       | 263a   | If supervisors had authority/experience etc, and an understanding of critical medication issues, either having psychiatry supervision of another practitioner with psychiatry back up, then the system will be and appear to be safe from a medication and risk perspective.          | key leader, 7              |
| <b>2. Practitioner—Practitioner interactions (Meso)</b> | CP-CP                               | CPs from across sites meet regularly                                 | 9       | If CPs engage in regular, planned peer supervision they can support each other and learn from each other's experiences.                                                                                                                                                               | 176    | If CPs from across sites meet regularly, then they can share success stories and build a community of peers                                                                                                                                                                           | key leader, 7              |
|                                                         | CP-CP                               | Planned time for CPs to discuss questions & problems with each other |         |                                                                                                                                                                                                                                                                                       | 208    | If time is planned for CPs to discuss questions and problems they are experiencing within PARTNERS with each other, then they are able to generate their own solutions, and to learn from each other.                                                                                 | key leader, 7              |
|                                                         | CP-CP                               | Whole team approach to supervision and training                      |         |                                                                                                                                                                                                                                                                                       | 309    | <i>If</i> a whole-team approach is followed in supervision and training <i>then</i> CPs (who may bring very specific experience and ways of working) can learn from each other and each other's cases                                                                                 | key leader, 7              |
|                                                         | GP—CP<br>Practitioner--practitioner | Goals are agreed and documented                                      | 10      | <i>If</i> the goals practitioners (CPs and GPs) are working towards are agreed and documented <i>then</i> there is possibility for practitioners to work independently with service users but also fluidly and together with other practitioners around these and other agreed goals. | 313    | <i>If</i> the goals practitioners (CPs and GPs) are working towards are agreed and documented <i>then</i> there is possibility for practitioners to work independently with service users but also fluidly and together with other practitioners around these and other agreed goals. | key leader, 7              |
|                                                         | CP-GP                               | CP tries to change experienced clinicians                            | 11      | If CPs are based in GP practices for a sustained period and are seen as an official part of the treatment team and processes of engaging the primary care are seen as helpful then they will effectively influence                                                                    | 286    | <i>If</i> the case manager makes an effort to try and change the behaviour of experienced clinicians <i>then</i> they are unlikely to make any difference.                                                                                                                            | key leader, 7              |

| Macro/Meso/Micro level | Outcome ( <i>then</i> ) category | Context/Mechanism ( <i>if</i> ) category                                             | CES No. | Consolidated Candidate Theory                                                                                                                                                                                                                                                                 | ES No. | ESs                                                                                                                                                                                                                                                                                                            | stakeholder, source number |
|------------------------|----------------------------------|--------------------------------------------------------------------------------------|---------|-----------------------------------------------------------------------------------------------------------------------------------------------------------------------------------------------------------------------------------------------------------------------------------------------|--------|----------------------------------------------------------------------------------------------------------------------------------------------------------------------------------------------------------------------------------------------------------------------------------------------------------------|----------------------------|
|                        |                                  |                                                                                      |         | the primary care team. But, if they try to tell other practitioners what to do and are seen as meddling then they will not be effective.                                                                                                                                                      |        |                                                                                                                                                                                                                                                                                                                |                            |
|                        | CP-GP                            | CP dogmatic & tells GP what to do                                                    |         |                                                                                                                                                                                                                                                                                               | 182    | If CPs are dogmatic and 'tell' GPs what to do, then GPs are less likely to listen and respect their views                                                                                                                                                                                                      | key leader, 7              |
|                        | CP-GP                            | CP based in GP practice for sustained period                                         |         |                                                                                                                                                                                                                                                                                               | 320    | <i>If</i> CPs are to build the appropriate relationships and respect to work effectively with GPs <i>Then</i> it is important that those from less senior practitioner backgrounds are based in GP practices for a sustained period of time                                                                    | key leader, 7              |
|                        | CP-GP / primary care             | CP official part of primary care team & engagement with primary care thought through |         |                                                                                                                                                                                                                                                                                               | 343    | <i>If</i> the CP is to interface effectively with those in primary care <i>then</i> it is important that they are an official part of the treatment team and that the processes of engaging and influencing primary care are thought through thoroughly so they are perceived as helpful rather than meddling. | key leader, 7              |
|                        | CP-GP-CMHT                       | CP acts as 3 way liaison between SU, GP & CMHT                                       | 12      | the case manager acts as a three-way liaison, a conveyor of information between SU, GP & CMHT, then communication improves                                                                                                                                                                    | 162    | If the case manager acts as a three-way liaison, a conveyor of information between SU, GP & CMHT, then communication improves                                                                                                                                                                                  |                            |
|                        | CP-GP-psychiatrist               | meetings between practitioners                                                       | 13      | If there are regular formal liaison meetings between CP, primary and secondary care practitioners then mutual trust will develop, problems can be tackled and more informal consultation can follow.<br><br>Whereas,<br><br>Heavy workloads and lack of trust will prevent peer consultation. | 232    | If initial liaison meetings are the building blocks for care, then more informal supportive decision making can follow                                                                                                                                                                                         | key leader, 7              |
|                        | CP-GP-psychiatrist               | meetings between practitioners                                                       |         |                                                                                                                                                                                                                                                                                               | 243    | If practitioners from both organisations meet to discuss cases, then mutual trust can develop and the skills of GPs can be evaluated (and developed).                                                                                                                                                          | key leader, 7              |

| Macro/Meso/Micro level | Outcome ( <i>then</i> ) category | Context/Mechanism ( <i>if</i> ) category                                                     | CES No. | Consolidated Candidate Theory                                                                                                                                                                         | ES No. | ESs                                                                                                                                                                                                                                                                                                                                                                                         | stakeholder, source number |
|------------------------|----------------------------------|----------------------------------------------------------------------------------------------|---------|-------------------------------------------------------------------------------------------------------------------------------------------------------------------------------------------------------|--------|---------------------------------------------------------------------------------------------------------------------------------------------------------------------------------------------------------------------------------------------------------------------------------------------------------------------------------------------------------------------------------------------|----------------------------|
|                        | CP-GP-psychiatrist               | meetings between practitioners                                                               |         |                                                                                                                                                                                                       | 362    | <i>If</i> Psychiatrists are to be linked in with the P2 intervention effectively <i>then</i> regular (every three months) meetings with GPs and CPs at the GP practice will build help build trust and tackle problems. This should not however replace clinical supervision through a separate P2 supervisor.                                                                              | key leader, 7              |
|                        | GP-psychiatrist                  | GPs overwhelmed by work<br><br>GPs don't have relationship of trust with psychiatrist        |         |                                                                                                                                                                                                       | 213    | If GPs are overwhelmed by work, and there is not a relationship of trust with the psychiatrist, then they may be unwilling to contact them for peer consultation.                                                                                                                                                                                                                           | key leader, 7              |
|                        | CP-other services                | If CP is in close communication with SU                                                      | 14      | If CP is in close communication with the SU and collaborative care is clearly defined and monitored (using protocols, training and supervision) then CPs will actively seek appropriate help for SUs. | 220a   | If the case manager is in close communication with the patient, then early physical/mental/social signs can be spotted early and referrals made quickly if needed to physical or mental health services for reactive care.– moved into this section                                                                                                                                         | key leader, 7              |
|                        | CP-other services                | Collaborative care clearly defined and monitored across, protocols, training and supervision |         |                                                                                                                                                                                                       | 328    | <i>If</i> CPs are to actively seek appropriate help for service users <i>then</i> it is important that this form<br><br>of collaborative working is clearly defined and monitored across protocols, training and supervision                                                                                                                                                                | key leader, 7              |
|                        | CP-SV                            | Dual supervision                                                                             | 15      | If CP get supervision from experts in both primary and secondary care they will have the support they need in terms of technical assistance and working with physical and mental health needs.        | 226    | If a dual supervision model is implemented, then case managers can get support for both mental and physical care issues                                                                                                                                                                                                                                                                     | key leader, 7              |
|                        | CP-SV                            | Dual supervision                                                                             |         |                                                                                                                                                                                                       | 175    | If CPs ask for support from supervisors who are secondary care experts, then their support may not be adequate because such supervisors may not have adequate organisational knowledge about primary care<br><br>If CPs are routed to organisational experts in primary care for support on technical assistance, then this support is likely to be more helpful then if they are routed to | key leader, 7              |

| Macro/Meso/Micro level                                       | Outcome ( <i>then</i> ) category | Context/Mechanism ( <i>if</i> ) category                             | CES No. | Consolidated Candidate Theory                                                                                                                                                                                                                                                                                                                                                                                                                                                   | ES No. | ESs                                                                                                                                                                                                                                                                                                                                | stakeholder, source number |
|--------------------------------------------------------------|----------------------------------|----------------------------------------------------------------------|---------|---------------------------------------------------------------------------------------------------------------------------------------------------------------------------------------------------------------------------------------------------------------------------------------------------------------------------------------------------------------------------------------------------------------------------------------------------------------------------------|--------|------------------------------------------------------------------------------------------------------------------------------------------------------------------------------------------------------------------------------------------------------------------------------------------------------------------------------------|----------------------------|
|                                                              |                                  |                                                                      |         |                                                                                                                                                                                                                                                                                                                                                                                                                                                                                 |        | experts in secondary care. <u>Also maybe 3. Resources for CP, backup and support.</u>                                                                                                                                                                                                                                              |                            |
|                                                              | CP-SV                            | Regular supervision                                                  | 16      | If CPs have regular supervision from supervisors who understand P2, have broad experience and knowledge, take a balanced view on medication vs therapy, understand the culture that CPs are working in, are good communicators, concise, able to tolerate uncertainty, make decisions on limited information and be democratic in decision making, then SV will be effective in supporting CPs with challenging caseloads and managing large caseloads in primary care settings | 172    | If CPs meet regularly (eg on a weekly basis) with their supervisor to review cases, then they can benefit from the supervisors' knowledge and experience in dealing with difficult or more challenging cases <u>(NB this could perhaps also go into Category Practitioners' understanding and skills)</u>                          | key leader, 7              |
|                                                              | CP-SV                            | SV qualities & qualifications                                        |         |                                                                                                                                                                                                                                                                                                                                                                                                                                                                                 | 177    | If a senior nurse supervises CPs who understands P2 well and has both the content expertise and a sense of the culture and the social networks that nurses have to navigate, then this will provide optimal supervision                                                                                                            | key leader, 7              |
|                                                              | CP-SV                            | SV qualities                                                         |         |                                                                                                                                                                                                                                                                                                                                                                                                                                                                                 | 264    | If supervisors are good communicators, concise, able to tolerate uncertainty, make decisions on limited information, be democratic in decision, have a broad experience, take a balanced view on medication vs therapy, then they are likely to be able to work well as supervisors for large caseloads in a primary care setting. | key leader, 7              |
|                                                              | general                          | Importance of networks, supervision protocols continually emphasised | 17      | <i>If</i> experienced professionals are to work collaboratively rather than in traditional individual idiosyncratic ways <i>then</i> the importance of networks, supervision and protocols must be continually emphasised                                                                                                                                                                                                                                                       | 323    | <i>If</i> experienced professionals are to work collaboratively rather than in traditional individual idiosyncratic ways <i>then</i> the importance of networks, supervision and protocols must be continually emphasised                                                                                                          | key leader, 7              |
| 3. engagement / acceptability (technically subcategory of 8) |                                  |                                                                      |         |                                                                                                                                                                                                                                                                                                                                                                                                                                                                                 |        |                                                                                                                                                                                                                                                                                                                                    |                            |

| Macro/Meso/Micro level | Outcome ( <i>then</i> ) category | Context/Mechanism ( <i>if</i> ) category                                                    | CES No. | Consolidated Candidate Theory                                                                                                                                                                                                                                       | ES No. | ESs                                                                                                                                                                                                                                                                       | stakeholder, source number   |
|------------------------|----------------------------------|---------------------------------------------------------------------------------------------|---------|---------------------------------------------------------------------------------------------------------------------------------------------------------------------------------------------------------------------------------------------------------------------|--------|---------------------------------------------------------------------------------------------------------------------------------------------------------------------------------------------------------------------------------------------------------------------------|------------------------------|
|                        | Clinicians Barriers              | Language used by researchers                                                                | 18      | If practitioners feel threatened or that the intervention is a criticism of their current practice then they will not accept it.                                                                                                                                    | 292    | If the researchers use language such as 'appropriate psychosocial interventions' <i>then</i> this will turn clinicians off (because no one thinks they are giving inappropriate psychosocial interventions)                                                               | key leader, 7                |
|                        | Clinicians barriers              | Practitioners feel changes challenge their professionalism                                  |         |                                                                                                                                                                                                                                                                     | 195    | If practitioners feel that changes to care challenge their professionalism, then they may resist by stating that they already know about and practice according to the proposed changes, when they do <i>not</i> know about and practice according to the changes to care | key leader, 7<br>Netherlands |
|                        | Clinicians Barriers              | Practitioners threatened                                                                    |         |                                                                                                                                                                                                                                                                     | S139   | If practitioners feel threatened by principles of recovery, <i>then</i> they may not engage honestly and/or openly with recovery principles                                                                                                                               | MH policy makers, 3          |
|                        | Clinicians Barriers              | Intervention complex, many components                                                       | 21      | If the intervention is too complicated or has too many components <i>then</i> clinicians will not engage with it                                                                                                                                                    | 290    | If the intervention is too complicated or has too many components <i>then</i> clinicians will not engage with it                                                                                                                                                          | key leader, 7                |
|                        | Clinicians Facilitators          | Professionals equate recovery to growing with continued disability                          | 22      | If professionals equate recovery with a way for service users to grow with or despite continuing disability, <i>then</i> working with everyone with severe mental illness towards the aim of recovery regardless of the severity of their SMI symptoms is realistic | S142   | If professionals equate recovery with a way for service users to grow with or despite continuing disability, <i>then</i> working with everyone with severe mental illness towards the aim of recovery regardless of the severity of their SMI symptoms is realistic       | MH policy makers, 3          |
|                        | Clinicians Facilitators          | Intervention framed as updating clinical skills & responding to national policy             | 23      | If the intervention is developed in collaboration with relevant stakeholders and is framed as updating clinical skills and responding to national policy and linked to SU benefit then it is more likely to be accepted.                                            | 288    | If the intervention is framed as updating clinical skills and responding to national policy instead of criticising the clinicians <i>then</i> they will be more likely to accept it (JA also added in Practitioners: social/cultural context)                             | key leader, 7                |
|                        | Clinicians Facilitators          | Intervention presented to show link between what clinicians asked to do and patient benefit |         |                                                                                                                                                                                                                                                                     | 289    | If the intervention is presented in a way which shows the link between what clinicians are being asked to do and patient benefit <i>then</i> they will be more likely to accept it                                                                                        | key leader, 7                |

| Macro/Meso/Micro level | Outcome ( <i>then</i> ) category                               | Context/Mechanism ( <i>if</i> ) category              | CES No. | Consolidated Candidate Theory                                                                                                                                                                                                                                                                                                                                                                                                                                                                                                              | ES No. | ESs                                                                                                                                                                                                                                                                                                            | stakeholder, source number |
|------------------------|----------------------------------------------------------------|-------------------------------------------------------|---------|--------------------------------------------------------------------------------------------------------------------------------------------------------------------------------------------------------------------------------------------------------------------------------------------------------------------------------------------------------------------------------------------------------------------------------------------------------------------------------------------------------------------------------------------|--------|----------------------------------------------------------------------------------------------------------------------------------------------------------------------------------------------------------------------------------------------------------------------------------------------------------------|----------------------------|
|                        | Clinicians facilitators<br>GPs facilitators<br>SU facilitators | Intervention developed with all relevant stakeholders |         |                                                                                                                                                                                                                                                                                                                                                                                                                                                                                                                                            | 284    | <i>If</i> the intervention is developed in collaboration with all the relevant stakeholders <i>then</i> it is more likely to be taken up                                                                                                                                                                       | key leader, 7              |
|                        | GP Facilitators                                                | GPs understanding of intervention                     | 24      | <p>If researchers explain clearly the benefits of PARTNERS to GPs, for example, improved support for SUs leading to better outcomes, flexible support for GPs to handle complex cases, and how the intervention meets local needs and targets,</p> <p>And</p> <p>If researchers prioritise informal relationships with GPs, for example by meeting them to talk at lunchtime sessions, more than communicating systematically and regularly, for example by emailed newsletters,</p> <p>And</p> <p>Then GPs are more likely to engage.</p> | 186    | If GPs understand P2 to offer support for treating people with SMI in a stepped care system, for example through protocols, liaison with mental health professionals like CP and/or improved access to psychiatric peer consultation, then they are more likely to be willing to engage with and appreciate P2 | key leader, 7              |
|                        | GP Facilitators                                                | GPs understanding of intervention                     |         |                                                                                                                                                                                                                                                                                                                                                                                                                                                                                                                                            | 242    | If GPs are provided with the flexible support they require for complex cases and to contribute to overall productive work, then the model will be acceptable to them.                                                                                                                                          | key leader, 7              |
|                        | GP Facilitators                                                | Researcher-GP interactions                            |         |                                                                                                                                                                                                                                                                                                                                                                                                                                                                                                                                            | 191    | If P2 is adaptable to local primary care contexts, and explained to GPs according to local primary care needs and practice targets, then GPs are more likely to become engaged                                                                                                                                 | key leader, 7              |
|                        | GP Facilitators                                                | Researcher-GP interactions                            |         |                                                                                                                                                                                                                                                                                                                                                                                                                                                                                                                                            | 293    | <i>If</i> researchers are very clear and precise about what practices will get from the intervention (eg coaching for patients or a specific way of achieving shared decision making) <i>then</i> practices will be more likely to engage                                                                      | key leader, 7              |
|                        | GP facilitators                                                | Researcher—GP interactions                            |         |                                                                                                                                                                                                                                                                                                                                                                                                                                                                                                                                            | 291    | <i>If</i> the researchers spend a great deal of time and effort on regular and systematic                                                                                                                                                                                                                      | key leader, 7              |

| Macro/Meso/Micro level                                         | Outcome ( <i>then</i> ) category | Context/Mechanism ( <i>if</i> ) category                              | CES No. | Consolidated Candidate Theory                                                                                                                                                                                  | ES No. | ESs                                                                                                                                                                                                                                 | stakeholder, source number              |
|----------------------------------------------------------------|----------------------------------|-----------------------------------------------------------------------|---------|----------------------------------------------------------------------------------------------------------------------------------------------------------------------------------------------------------------|--------|-------------------------------------------------------------------------------------------------------------------------------------------------------------------------------------------------------------------------------------|-----------------------------------------|
|                                                                |                                  |                                                                       |         |                                                                                                                                                                                                                |        | communication with teams <i>then</i> this is unlikely to be taken much notice of                                                                                                                                                    |                                         |
|                                                                | GP facilitators                  | Researcher—GP interactions                                            |         |                                                                                                                                                                                                                | 335    | <i>If</i> GPs and GP practices are to engage with P2 <i>then</i> talking at a lunchtime session may be the best way to gain their support for P2                                                                                    | key leader, 7                           |
|                                                                | GP Facilitators                  | Researcher—GP interactions                                            | 25      | If GPs can be trained to understand the recovery model then (they will be able to support a recovery oriented model).                                                                                          | 265    | If GPs can be trained to understand the recovery model then (they will be able to support a recovery oriented model).                                                                                                               | key leader, 7                           |
|                                                                | Teams facilitators               | Teams have adequate leadership, stability and readiness to change     | 26      | <i>If</i> teams have adequate leadership, stability and readiness to change <i>then</i> they will engage with a new intervention                                                                               | 281    | <i>If</i> teams have adequate leadership, stability and readiness to change <i>then</i> they will engage with a new intervention                                                                                                    | key leader, 7                           |
|                                                                | Organisational facilitators      | Organisation: culture                                                 | 27      | If researchers discuss the intervention with community leaders and the health service culture can tolerate risk and uncertainty then P2 is more likely to be accepted.                                         | 239    | If the health service culture can tolerate risk and uncertainty, then a model which provides lighter touch input to larger numbers of individuals with severe mental illness based in primary care is more likely to be acceptable. | key leader, 7                           |
|                                                                | Organisational facilitators      | Practitioner perceptions, understanding and skills: leader engagement |         |                                                                                                                                                                                                                | 294    | If the researchers discuss a proposed intervention with community leaders before the project gets going then it is more likely to be locally acceptable                                                                             | key leader, 7                           |
|                                                                | SU barriers                      | SU previous positive experience                                       | 28      |                                                                                                                                                                                                                | S144   | <i>If</i> service users are satisfied with their current treatment, <i>then</i> they may feel concern that adoption of recovery principles may threaten their established coping mechanisms.                                        | MH policy makers, 3                     |
|                                                                | SU facilitators                  | Patient and public involvement                                        | 29      |                                                                                                                                                                                                                | 217    | If service users and carers are involved in the preliminary and later stages of a programme grant, then this will improve the relevance of the intervention                                                                         | key leader, 7                           |
| 4. Practitioner, perceptions, understanding and skills (Micro) | CP Empowerment                   | Organisational approach                                               | 30      | If policy, funding, structures and organisations support the delivery of care based on recovery principles through eg supervision and job descriptions then CPs will be empowered to deliver the intervention. | S1     | If policy and funding are sympathetic to recovery-related ways of thinking and working then practitioners will be empowered to implement recovery principles                                                                        | practitioners, 2<br>MH policy makers, 3 |

| Macro/Meso/Micro level | Outcome ( <i>then</i> ) category                   | Context/Mechanism ( <i>if</i> ) category                                | CES No. | Consolidated Candidate Theory                                                                                                                                                                                                                                                                                     | ES No. | ESs                                                                                                                                                                                                                                                                 | stakeholder, source number                  |
|------------------------|----------------------------------------------------|-------------------------------------------------------------------------|---------|-------------------------------------------------------------------------------------------------------------------------------------------------------------------------------------------------------------------------------------------------------------------------------------------------------------------|--------|---------------------------------------------------------------------------------------------------------------------------------------------------------------------------------------------------------------------------------------------------------------------|---------------------------------------------|
|                        | CP Empowerment                                     | Organisational approach                                                 |         |                                                                                                                                                                                                                                                                                                                   | S2     | If structures and organisations change (e.g. workforce, training, outcomes evaluation) to recovery-related ways of thinking and working, <i>then</i> practitioners will be empowered to implement recovery principles                                               | practitioners, 2<br><br>MH policy makers, 3 |
|                        | CP Empowerment / confidence                        | CPs have significant supervisory, managerial and organisational support |         |                                                                                                                                                                                                                                                                                                                   | 351    | <i>If</i> CPs are to feel safe and supported in delivering the P2 model <i>then</i> they require significant supervisory, managerial and organisational support and agreement (including explicit job descriptions) to deliver individualised P2 protocolised care. | key leader, 7                               |
|                        | Managing CP anxiety re risk                        | Reliable recall system                                                  | 31      | If there is monitoring of functioning across all SUs, a reliable recall system and handover between practitioners then practitioners may be less anxious and manage risk more effectively.                                                                                                                        | 260    | If there is a reliable recall system, then risk averse practitioners may worry less and be able to tolerate a larger caseload.                                                                                                                                      | key leader, 7                               |
|                        | Managing CP anxiety re risk                        | Practitioner—practitioner interactions                                  |         |                                                                                                                                                                                                                                                                                                                   | 261    | [Also in 4. And 8.]<br><br>If there is a hand over from old to new practitioner, then anxieties are reduced in anxious practitioners, carers and patients, as well as improving care.                                                                               | key leader, 7                               |
|                        | Managing CP anxiety re risk                        | If CP monitors symptoms and functioning across all SUs on caseload      |         |                                                                                                                                                                                                                                                                                                                   | 230    | If symptom (and function) monitoring by case manager across all patients happened, then they could ensure an understanding of who is most at risk .                                                                                                                 | key leader, 7                               |
|                        | Care Partner perceptions, understanding and skills | Ideologies                                                              | 32      | If practitioners are preoccupied by evidence-based approaches, then they may focus on treating symptoms and see SU as passive.<br><br>Whereas if there is a focus on meaningful individual goals, which are communicated through documentation, then practitioners will be mindful to work to deliver this focus. | S61    | <i>If</i> practitioners are preoccupied by evidence-based approaches, <i>then</i> this can narrow ideas of treatment to the alleviation of symptoms                                                                                                                 | MH policy makers, 3                         |

| Macro/Meso/Micro level | Outcome ( <i>then</i> ) category                   | Context/Mechanism ( <i>if</i> ) category                                               | CES No. | Consolidated Candidate Theory                                                                                                                                                                                                                                                           | ES No. | ESs                                                                                                                                                                                                                                                                                                             | stakeholder, source number |
|------------------------|----------------------------------------------------|----------------------------------------------------------------------------------------|---------|-----------------------------------------------------------------------------------------------------------------------------------------------------------------------------------------------------------------------------------------------------------------------------------------|--------|-----------------------------------------------------------------------------------------------------------------------------------------------------------------------------------------------------------------------------------------------------------------------------------------------------------------|----------------------------|
|                        | Care Partner perceptions, understanding and skills | Ideologies                                                                             |         |                                                                                                                                                                                                                                                                                         | S62    | <i>If</i> practitioners are preoccupied by evidence-based approaches, <i>then</i> this can create ideas of ideal practice to be the kind where the specialist specifies treatment for a passive patient                                                                                                         | MH policy makers, 3        |
|                        | CP perceptions, understandings & skills            | Meaningful individual goal identified and communicated through records                 |         |                                                                                                                                                                                                                                                                                         | 306    | <i>If</i> a meaningful individual goal rather than a medical practitioner focussed goal is identified by the service user and this focus is supported, highlighted and communicated through their care plan/documentated records, <i>then</i> CPs and GPs will be more mindful to work to reinforce this focus. | key leader, 7              |
|                        | Care Partner perceptions, understanding and skills | Intervention described from point of view of CP                                        | 33      | <i>If</i> the proposed intervention is described from the point of view of the person delivering it <i>then</i> they will have a better understanding of what they are being expected to do                                                                                             | 287    | <i>If</i> the proposed intervention is described from the point of view of the person delivering it <i>then</i> they will have a better understanding of what they are being expected to do                                                                                                                     | key leader, 7              |
|                        | CP knowledge of physical & mental health           | Training covers mental and physical care and addresses CPs individuals skills deficits | 34      | If training for CPs covers mental and physical care and addresses CP's skills deficits or the CP has experience of physical healthcare cultures or has a background as an advance practice nurse then the CP will be equipped to support the SU's physical and mental health care needs | 227    | Training for case manager should cover mental and physical care and emphasise the individual's person skillset deficit, then they will be more equipped to support the whole person.                                                                                                                            | key leader, 7              |
|                        | CP knowledge of physical & mental health           | CP has experience of physical health care                                              |         |                                                                                                                                                                                                                                                                                         | 218    | If case manager has experience of physical health care and illness, then they will be more easily able to co-ordinate physical and mental health care (JA could potentially add in interactions between practitioners and practitioners)                                                                        | key leader, 7              |
|                        | CP knowledge of physical & mental health           | CP has knowledge of culture of physical & mental health care services                  |         |                                                                                                                                                                                                                                                                                         | 234    | If the case manager is familiar with cultures of mental health and physical health, then they can more easily fulfil role that involves both worlds.                                                                                                                                                            | key leader, 7              |
|                        | CP knowledge of physical health                    | CP is advanced nurse                                                                   |         |                                                                                                                                                                                                                                                                                         | 156    | If the professional background of the case worker is that of an advanced practice nurse, then they are more able to support the medical aspects of self-care management                                                                                                                                         | key leader, 7              |
|                        | CP skills                                          | If CPs are experienced mental health nurses                                            | 35      | If CPs are experienced mental health nurses, then they will have the skills they need to work with service users                                                                                                                                                                        | 202    | If CPs are experienced mental health nurses, then they will have the skills they need to work with service users                                                                                                                                                                                                | key leader, 7              |

| Macro/Meso/Micro level | Outcome ( <i>then</i> ) category | Context/Mechanism ( <i>if</i> ) category                        | CES No. | Consolidated Candidate Theory                                                                                                                                                                                                                                                                                                                                                                                                                                                                              | ES No. | ESs                                                                                                                                                                                                                                                                                                                                                         | stakeholder, source number |
|------------------------|----------------------------------|-----------------------------------------------------------------|---------|------------------------------------------------------------------------------------------------------------------------------------------------------------------------------------------------------------------------------------------------------------------------------------------------------------------------------------------------------------------------------------------------------------------------------------------------------------------------------------------------------------|--------|-------------------------------------------------------------------------------------------------------------------------------------------------------------------------------------------------------------------------------------------------------------------------------------------------------------------------------------------------------------|----------------------------|
|                        | CP profession                    | If CP role adapted to account for professional background       | 36      | If the role of the CP is adapted according to their professional background or an adequate level of supervision is provided<br><br>Then CPs can be from any professional background                                                                                                                                                                                                                                                                                                                        | 157    | If the role of the case manager is adapted to account for their professional background, then hiring case managers from a range of different professional backgrounds is feasible                                                                                                                                                                           | key leader, 7              |
|                        | CP profession                    | Adequate level of supervision provided                          |         |                                                                                                                                                                                                                                                                                                                                                                                                                                                                                                            | 321    | <i>If</i> an adequate level of supervision is provided <i>then</i> CPs can be nurses, social workers or OTs. This is particularly relevant for social workers and OTs whose assessment skills for psychosis may not be optimal                                                                                                                              | key leader, 7              |
|                        | CP qualities                     | If CPs seconded, if they are younger, not embedded in system    | 37      | <i>If</i> a care manager is to be seconded to work on P2 <i>then</i> they are more likely to be proactive and energetic if they are a little younger and open rather than someone who is embedded in the system from having worked in it for a sustained period of time.                                                                                                                                                                                                                                   | 342    | <i>If</i> a care manager is to be seconded to work on P2 <i>then</i> they are more likely to be proactive and energetic if they are a little younger and open rather than someone who is embedded in the system from having worked in it for a sustained period of time.                                                                                    | key leader, 7              |
|                        | GP attitude                      | Transfer to GPs seen as mark of esteem                          | 38      | If transfer to GPs is seen as a mark of esteem, training is provided for primary care workers, secondary care workers are based in a primary care and meet regularly with the primary care team, as part of a protocolised collaborative care approach practised over time, allowing GPs to gain trust in other practitioners, then GPs will be more comfortable, work constructively with other practitioners, develop skills and become progressively empowered to deliver care to SU diagnosed with SMI | 244    | If transfer to GPs is seen as a mark of esteem, then GPs will ask for and more easily accept transfers to primary care.                                                                                                                                                                                                                                     | key leader, 7              |
|                        | GP attitude                      | Flexible approach built on confidence and appropriate protocols |         |                                                                                                                                                                                                                                                                                                                                                                                                                                                                                                            | 310    | <i>If</i> a flexible approach built on confidence, trust and appropriate protocols is developed with GPs and GP practice nurses (I think) <i>then</i> they are likely to be more engaged with the team working around the service user and the multi-professional focus on the wider health and well-being of the service user.<br>A little vague this one! | key leader, 7              |

| Macro/Meso/Micro level | Outcome ( <i>then</i> ) category | Context/Mechanism ( <i>if</i> ) category                               | CES No. | Consolidated Candidate Theory                                                                                                                                                                                                                                                                            | ES No. | ESs                                                                                                                                                                                                                                                                                                                | stakeholder, source number |
|------------------------|----------------------------------|------------------------------------------------------------------------|---------|----------------------------------------------------------------------------------------------------------------------------------------------------------------------------------------------------------------------------------------------------------------------------------------------------------|--------|--------------------------------------------------------------------------------------------------------------------------------------------------------------------------------------------------------------------------------------------------------------------------------------------------------------------|----------------------------|
|                        | GP attitude                      | If CC programme implemented                                            |         |                                                                                                                                                                                                                                                                                                          | 311    | <i>If a collaborative care programme is implemented then GPs learn to be more comfortable, flexible and adaptive after they hand over care of their patients to the CP.</i>                                                                                                                                        | key leader, 7              |
|                        | GP knowledge                     | If CC practiced over time                                              |         |                                                                                                                                                                                                                                                                                                          | 339    | <i>If collaborative care is practiced over time then primary care providers gain progressive empowerment and shoulder more of the care as they gain experience, deal with complicated tasks and ask more complicated questions of Psychiatrists (Supervisors).</i>                                                 | key leader, 7              |
|                        | GP knowledge                     | Providing training for GPs                                             |         |                                                                                                                                                                                                                                                                                                          | 279    | If collaborative care is to be achieved by providing some basic education and training for primary care providers initially, gradually empowering them whilst reducing the role of consultant psychiatrists, then this could be achieved as more of an evolving process rather than a static protocolised process. | key leader, 7              |
|                        | GP behaviour                     | Relationship between CP & GP should be thought through in depth        |         |                                                                                                                                                                                                                                                                                                          | 347    | <i>If the goal of P2 is to change the practice of primary care doctors then the relationship between CPs and GPs should be thought through in-depth as the primary care doctor is likely to have competing system pressures from their own care provider/organisations.</i>                                        | key leader, 7              |
|                        | GP knowledge                     | If 1ry & 2ry care practitioners meet to discuss cases                  |         |                                                                                                                                                                                                                                                                                                          | 243    | If practitioners from both organisations meet to discuss cases, then mutual trust can develop and the skills of GPs can be evaluated (and developed).                                                                                                                                                              |                            |
|                        | GP confidence                    | Co-location of primary & 2ry services                                  |         |                                                                                                                                                                                                                                                                                                          | 258    | If colocated, then GPs feel more confident in the system.                                                                                                                                                                                                                                                          | key leader, 7              |
|                        | GP attitudes                     | Meaningful individual goal identified and communicated through records | 39      | <i>If a meaningful individual goal rather than a medical practitioner focussed goal is identified by the service user and this focus is supported, highlighted and communicated through their care plan/documentated records, then CPs and GPs will be more mindful to work to reinforce this focus.</i> | 306b   | <i>If a meaningful individual goal rather than a medical practitioner focussed goal is identified by the service user and this focus is supported, highlighted and communicated through their care plan/documentated records, then CPs and GPs will be more mindful to work to reinforce this focus.</i>           | key leader, 7              |
|                        | GP knowledge lost                | GP training not immediately before intervention                        | 40      | If GPs are trained but then do not utilise the content soon after then the new knowledge is likely to be lost.                                                                                                                                                                                           | 187    | If GPs are trained but then do not utilise the content soon after then the new knowledge is likely to be lost.                                                                                                                                                                                                     | key leader, 7              |

| Macro/Meso/Micro level                        | Outcome ( <i>then</i> ) category                          | Context/Mechanism ( <i>if</i> ) category                                                           | CES No. | Consolidated Candidate Theory                                                                                                                                                                                                                                                                                                                         | ES No. | ESs                                                                                                                                                                                                                                                                                                                         | stakeholder, source number |
|-----------------------------------------------|-----------------------------------------------------------|----------------------------------------------------------------------------------------------------|---------|-------------------------------------------------------------------------------------------------------------------------------------------------------------------------------------------------------------------------------------------------------------------------------------------------------------------------------------------------------|--------|-----------------------------------------------------------------------------------------------------------------------------------------------------------------------------------------------------------------------------------------------------------------------------------------------------------------------------|----------------------------|
|                                               | Dr's attitudes                                            | Call meetings between GPs & psychiatrists consultation not supervision                             | 41      | If contact is established between GPs & psychiatrists, and this is called peer consultation rather than supervision, then GPs will be well supported to work with people with SMI                                                                                                                                                                     | 173    | If more senior health care practitioners (eg, GPs and psychiatrists) meet to discuss difficult cases, then their seniority is respected by calling this 'peer consultation' rather than 'supervision'                                                                                                                       | key leader, 7              |
|                                               | GP knowledge / skills                                     | GP- psychiatrist peer consultation, relationships where GPs can interact easily with psychiatrists |         |                                                                                                                                                                                                                                                                                                                                                       | 185    | If GPs and willing or required to treat people with SMI, then they are best trained/supported by facilitating GP—psychiatrist peer consultation, where relationships are established so that GP can telephone/interact easily with psychiatrists<br><br><i>Then GPs will be well supported to work with people with SMI</i> | key leader, 7              |
| <b>5. SU—practitioner interactions (meso)</b> |                                                           |                                                                                                    |         |                                                                                                                                                                                                                                                                                                                                                       |        |                                                                                                                                                                                                                                                                                                                             |                            |
| 5                                             | SU-CP interactions<br><br>Barrier to shared understanding | Organisational context<br><br>Lack of continuity                                                   | 42      | If there are frequent changes of practitioner, then practitioners and service users can't build trusting relationships in which there is a good understanding of the SU.<br><br>Whereas,<br><br>If service users have continuity of care, then practitioners and SUs can build relationships in which there is a good understanding of the SUs needs. | 366    | If there are frequent changes of practitioner, due to high staff turnover, reorganisation of services, or transfer between services, then practitioners and service users can't build trusting relationships in which there is a good understanding of the SU                                                               | SU, 8                      |
| 5                                             | SU-CP interactions<br><br>Shared understanding            | Organisational context<br><br>Continuity                                                           |         |                                                                                                                                                                                                                                                                                                                                                       | 367    | If service users have continuity of care, seeing the same practitioner over longer periods then practitioners and SU can build relationships in which there is a good understanding of the SU                                                                                                                               | SU, 8                      |
| 5                                             | SU-CP interactions                                        | Organisational context<br><br>Reduced resources                                                    | 43      | If there are reduced resources then clinicians may offer less time for talking and                                                                                                                                                                                                                                                                    | 374    | If there are reduced resources then clinicians may offer less time for talking and                                                                                                                                                                                                                                          | SU, 8                      |

| Macro/Meso/Micro level | Outcome ( <i>then</i> ) category         | Context/Mechanism ( <i>if</i> ) category       | CES No. | Consolidated Candidate Theory                                                                                                                                                                                                                                                                                                    | ES No. | ESs                                                                                                                                                                                                                                                                                                                              | stakeholder, source number |
|------------------------|------------------------------------------|------------------------------------------------|---------|----------------------------------------------------------------------------------------------------------------------------------------------------------------------------------------------------------------------------------------------------------------------------------------------------------------------------------|--------|----------------------------------------------------------------------------------------------------------------------------------------------------------------------------------------------------------------------------------------------------------------------------------------------------------------------------------|----------------------------|
|                        | Barrier to shared understanding          |                                                |         | use a more controlling approach to working with service users.                                                                                                                                                                                                                                                                   |        | use a more controlling approach to working with service users.                                                                                                                                                                                                                                                                   |                            |
|                        | SU—practitioner interactions             | SU appearance                                  | 44      | <i>If</i> service users looked ‘too well’, <i>then</i> others (eg state benefits) could refuse to believe they needed help                                                                                                                                                                                                       | S131   | <i>If</i> service users looked ‘too well’, <i>then</i> others (eg state benefits) could refuse to believe they needed help                                                                                                                                                                                                       | SU, 4                      |
|                        | SU—CP interactions                       | Practitioner behaviour                         | 45      | If the practitioner generalises the confidence they have that service users can set, own and achieve meaningful goals for themselves to the extent that they blame the service user for the difficulties they find themselves in, then the practitioners’ confidence is unrealistic and becomes destructive to the service user. | S39    | If the practitioner generalises the confidence they have that service users can set, own and achieve meaningful goals for themselves to the extent that they blame the service user for the difficulties they find themselves in, then the practitioners’ confidence is unrealistic and becomes destructive to the service user. | practitioners, 2           |
|                        | SU-CP interactions                       | SU-CP interactions                             | 46      | If the CP is in close communication with the SU and provides a non-judgmental relationship, so that SUs trust CPs enough to be open, and balances aspiration and realism, then CPs can identify SU needs and respond appropriately and meaningful goals can be planned and achieved                                              | 180    | If CPs develop non-judgmental relationships with SUs, where SUs feel able to talk about issues that are not socially acceptable, then together they can talk about behaviour change in a more realistic way                                                                                                                      | key leader, 7              |
|                        | SU—CP interactions                       | SU—CP interactions                             |         |                                                                                                                                                                                                                                                                                                                                  | S41    | If the practitioner and service user balance hope, aspiration, expectation and realism, then meaningful goals can be planned and achieved                                                                                                                                                                                        | practitioners, 2           |
|                        | SU-CP interactions                       | SU-CP interactions                             |         |                                                                                                                                                                                                                                                                                                                                  | 220b   | If the case manager is in close communication with the patient, then early physical/mental/social signs can be spotted early and referrals made quickly if needed to physical or mental health services for reactive care.— moved into this section                                                                              | key leader, 7              |
|                        | SU—CP interactions                       | SU-CP interactions                             |         |                                                                                                                                                                                                                                                                                                                                  | 181    | If SUs trust CPs enough to be honest about the reasons for their behaviour, then CPs can respond more appropriately in supporting SUs because they have a more accurate shared understanding of the individuals’ context                                                                                                         | key leader, 7              |
|                        | SU—CP interactions<br>Equal relationship | SU-CP interactions (different from usual care) | 47      | If CPs follow the ethos of P2, where the SU is seen as part of the team, rather than focus on risk and surveillance and aims during care planning are of equal value to                                                                                                                                                          | 326    | If CPs are to engage service users to work collaboratively and towards the recovery agenda then they must follow the key ethos of P2 rather than the traditional surveillance                                                                                                                                                    | key leader, 7              |

| Macro/Meso/Micro level                                                | Outcome ( <i>then</i> ) category                | Context/Mechanism ( <i>if</i> ) category | CES No. | Consolidated Candidate Theory                                                                                                        | ES No. | ESs                                                                                                                                                                                                                                                                                                                                    | stakeholder, source number         |
|-----------------------------------------------------------------------|-------------------------------------------------|------------------------------------------|---------|--------------------------------------------------------------------------------------------------------------------------------------|--------|----------------------------------------------------------------------------------------------------------------------------------------------------------------------------------------------------------------------------------------------------------------------------------------------------------------------------------------|------------------------------------|
|                                                                       |                                                 |                                          |         | practitioner and SU then CPs are more likely work to collaboratively, on an equal basis with SUs                                     |        | and risk culture often evident in acute mental health care.                                                                                                                                                                                                                                                                            |                                    |
|                                                                       | SU—CP interactions<br>Equal relationship        | SU—CP interactions                       |         |                                                                                                                                      | S37    | <i>If</i> the aims during care planning are of equal value to both practitioner and service user, <i>then</i> interactions on a partnership level (as opposed to unequal professional—passive patient relationships) are more likely                                                                                                   | practitioners, 2                   |
| 5                                                                     | CP-SU interactions<br>Power imbalance           | Practitioner characteristics             |         |                                                                                                                                      | 432    | If mental health practitioners are paid workers than there is an inevitable power imbalance between them and service users.                                                                                                                                                                                                            | SU, 8                              |
|                                                                       | SU—practitioner interactions<br>Power imbalance | Conceptualising relationship             |         |                                                                                                                                      | 273    | If you think of the team as one group of people acting ON another group then the relationship is inevitably unequal                                                                                                                                                                                                                    | key leader, 7                      |
|                                                                       | SU-CP interactions                              | Supervision for CP                       | 48      |                                                                                                                                      | 303    | <i>If</i> CPs are to continue to try and support and engage with service users <i>Then</i> they need a lot of support and empathy from the supervision team to ensure they don't feel unwanted, rejected or that they are delivering a programme of support that service users do not like or is letting them (the service user) down. | key leader, 7                      |
|                                                                       | SU—CP interactions                              | SU previous experience                   | 49      | If Sus have negative experiences of mental health care, and this has negatively affected their identity then the SU may disengage.   | S143   | <i>If</i> service users have negative experiences of mental health care, <i>then</i> they may work to appear to be 'recovered' to get out of the system even though they have not recovered in any meaningful sense                                                                                                                    | MH policy makers, 3; researcher, 6 |
|                                                                       | SU—CP interactions                              | SU identity / previous experience        |         |                                                                                                                                      | S23    | If a 'service user identity' takes over a person's whole identity, then they may seek to distance themselves from the mental health community (and services) in order to affirm themselves as more than their mental illness                                                                                                           | SU, 4                              |
| 6. Service users: organisational context (experience of care) (macro) |                                                 |                                          |         |                                                                                                                                      |        |                                                                                                                                                                                                                                                                                                                                        |                                    |
|                                                                       | General improvement for SUs: experience of care | Physical health<br>QoF                   | 50      | If CPs acts as a liason between SU (and their families), and practitioners in primary and secondary care, coordinating mental health | 190    | If CPs follow a protocol to ensure that primary and secondary health screening for SUs was in line with NICE guidelines, liaising                                                                                                                                                                                                      | key leader, 7                      |

| Macro/Meso/Micro level | Outcome ( <i>then</i> ) category                | Context/Mechanism ( <i>if</i> ) category                 | CES No. | Consolidated Candidate Theory                                                                                                                                                                         | ES No. | ESs                                                                                                                                                                                                                                                                                               | stakeholder, source number |
|------------------------|-------------------------------------------------|----------------------------------------------------------|---------|-------------------------------------------------------------------------------------------------------------------------------------------------------------------------------------------------------|--------|---------------------------------------------------------------------------------------------------------------------------------------------------------------------------------------------------------------------------------------------------------------------------------------------------|----------------------------|
|                        |                                                 | Coordination of care                                     |         | input, working with all parties to ensure physical health screening takes place, and liaising with community/third sector groups to support social support, then the SU will experience improved care |        | with primary or secondary practitioners to prompt screening where needed, and preparing SUs to attend screening visits, then this will improve SUs mental and physical health care.                                                                                                               |                            |
|                        | General improvement for SUs: experience of care | CP coordinates mh input                                  |         |                                                                                                                                                                                                       | 219    | If the care manager has a role to coordinate mental health input – both educational/self-help and therapeutic, then the total care will be more likely to be what the individual as a whole needs.                                                                                                | key leader, 7              |
|                        | General improvement for SUs: experience of care | CP coordinates care                                      |         |                                                                                                                                                                                                       | 162    | If the case manager acts as a three-way liaison, a conveyor of information between SU, GP & CMHT, then improved communication leads to improved care                                                                                                                                              | key leader, 7              |
|                        | General improvement for SUs: experience of care | CP coordinates care,<br>CP-SU-carer interaction          |         |                                                                                                                                                                                                       | 199    | If the CP takes the initiative in involving the service users and their carers and/or family in PARTNERS care, and coordinates that care with other practitioners for example the GP or psychiatrist, then the quality of care received by the service user in relation to that care will improve | key leader, 7              |
| 6                      | SUs experience of care (positive)               | CP care coordination role                                |         |                                                                                                                                                                                                       | 379    | If there is a single practitioner managing input from multiple services and following up on how input is delivered on the service users behalf, then service users experience this as helpful.                                                                                                    | SU, 8                      |
|                        | General improvement for SUs: experience of care | Handover between practitioners                           |         |                                                                                                                                                                                                       | 261    | [Also in 2. And 4.]<br><br>If there is a hand over from old to new practitioner, then anxieties are reduced in anxious practitioners, carers and patients, as well as improving care.                                                                                                             | key leader, 7              |
| 6                      | SU experiences of care (positive)               | Communication between services<br>Practitioner knowledge |         |                                                                                                                                                                                                       | 452    | If mental health and physical health services communicate about the person's needs and both take into account the likely impact of the other condition then this is experienced as good care.                                                                                                     | SU, 8                      |

| Macro/Meso/Micro level | Outcome ( <i>then</i> ) category                     | Context/Mechanism ( <i>if</i> ) category               | CES No. | Consolidated Candidate Theory                                                                                                                                                                                                                                                                                                                                                                                                                                                                                                     | ES No. | ESs                                                                                                                                                                                                                                                                  | stakeholder, source number |
|------------------------|------------------------------------------------------|--------------------------------------------------------|---------|-----------------------------------------------------------------------------------------------------------------------------------------------------------------------------------------------------------------------------------------------------------------------------------------------------------------------------------------------------------------------------------------------------------------------------------------------------------------------------------------------------------------------------------|--------|----------------------------------------------------------------------------------------------------------------------------------------------------------------------------------------------------------------------------------------------------------------------|----------------------------|
| 6                      | SU experiences of care (positive)                    | SU-practitioner interactions<br>Practitioner knowledge |         |                                                                                                                                                                                                                                                                                                                                                                                                                                                                                                                                   | 451    | If SU are given support to take care of their physical health and practitioners understand the links between physical and mental health, this is experienced as positive by SUs.                                                                                     | SU, 8                      |
|                        | Improvement for SUs: access to peer support & groups | Coordination of care<br>CP-3 <sup>rd</sup> sector      |         |                                                                                                                                                                                                                                                                                                                                                                                                                                                                                                                                   | 300    | If the CP creates links and liaison with existing groups in the community then this may be an efficient way of organising peer support/group work.                                                                                                                   | key leader, 7              |
|                        | Appropriate support, identifies & meets needs        | CP knowledge, skills<br>Organisation: roles            | 51      | <i>If</i> the CP:<br><br>acts as a primary point of contact,<br><br>follows up care,<br><br>has appropriate training,<br><br>has access to consultation,<br><br>has good communication skills,<br><br>assesses needs on an individual basis,<br><br>involves SUs in decisions,<br><br>provides guidance based on knowledge, and/or<br><br>offers rather than imposes strategies,<br><br><i>then</i> SUs are most likely to have their individual needs identified and get appropriate personalised support that meets their needs | 249    | [also in 7. SU perceptions, understanding and skills]<br>If a case manager has good communication skills AND a role to follow up, then individuals are more likely to be retained in care and get the support they need.                                             | key leader, 7              |
|                        | Appropriate support, identifies & meets needs        | CP coordinates care                                    |         |                                                                                                                                                                                                                                                                                                                                                                                                                                                                                                                                   | 221    | If the case manager has responsibility to be primary point of contact and assess needs on an individual basis, then the individual can receive the most appropriate proactive care for their needs.                                                                  | key leader, 7              |
|                        | Appropriate support, identifies & meets needs        | CP skills / training<br>Relationship between services  |         |                                                                                                                                                                                                                                                                                                                                                                                                                                                                                                                                   | 322    | <i>if</i> service users are to be assessed appropriately for psychosis( relapse) <i>then</i> it is important that appropriate training and service connections are available so that CPs can access appropriate medical support or arrange appropriate reassessments | key leader, 7              |

| Macro/Meso/Micro level | Outcome ( <i>then</i> ) category                                     | Context/Mechanism ( <i>if</i> ) category | CES No. | Consolidated Candidate Theory                                                                                                                                                                                                                                                                                                                                                                                                                                                                                   | ES No. | ESs                                                                                                                                                                                                                              | stakeholder, source number |
|------------------------|----------------------------------------------------------------------|------------------------------------------|---------|-----------------------------------------------------------------------------------------------------------------------------------------------------------------------------------------------------------------------------------------------------------------------------------------------------------------------------------------------------------------------------------------------------------------------------------------------------------------------------------------------------------------|--------|----------------------------------------------------------------------------------------------------------------------------------------------------------------------------------------------------------------------------------|----------------------------|
|                        | Appropriate support, identifies & meets needs                        | CP –Su interactions, Cp Behvaieur        |         |                                                                                                                                                                                                                                                                                                                                                                                                                                                                                                                 | 200    | If the CP identified the needs of the service user including mental, physical and social needs, then worked to help provide those needs, then this would be the optimal intervention                                             | key leader, 7              |
|                        | Appropriate support, identifies & meets needs                        | CP-SU interactions                       |         |                                                                                                                                                                                                                                                                                                                                                                                                                                                                                                                 | 222    | If in the decision making process patients are involved through eliciting their preferences AND practitioners provide structured guidance based on knowledge (and experience), then the most appropriate decisions will be made. | key leader, 7              |
|                        | General improvement for SUs: experience of care, personalised        | CP training                              |         |                                                                                                                                                                                                                                                                                                                                                                                                                                                                                                                 | 276    | If support staff ( <u>JA – check interview and this relates to key practitioners not admin</u> ) are trained to work differently with service users then the intervention will offer a service that is different from usual care | key leader, 7              |
|                        | Appropriate support, identifies & meets needs                        | CP-SU interactions                       |         |                                                                                                                                                                                                                                                                                                                                                                                                                                                                                                                 | 278    | If clinicians offer things that the individual may or may not choose to take up then the intervention is more likely to fit in with the person's recovery journey                                                                | key leader, 7              |
|                        | Inappropriate support, needs not identified & meets (non-responsive) | Trust                                    | 52      | <p>If a therapeutic relationship with the SU is established by the CP, eg.,</p> <p>CPs are gentle, caring, compassionate, supportive, empathetic;</p> <p>Go above and beyond;</p> <p>Make SUs feel relaxed &amp; safe by following through on commitments; and/or</p> <p>Respect SUs as people, taking them seriously, establishing a shared connection/friendship that develops over time and working with SUs 'as a team', involving SUs in decisions, giving choices and negotiating about disagreement,</p> | 426a   | If SUs do not trust practitioners then they won't open up or follow their advice and so care will not be appropriate.                                                                                                            | SU, 8                      |

| Macro/Meso/Micro level | Outcome ( <i>then</i> ) category                           | Context/Mechanism ( <i>if</i> ) category   | CES No. | Consolidated Candidate Theory                                                                                                                                                | ES No. | ESs                                                                                                                                                                                                                                                                                                                                | stakeholder, source number |
|------------------------|------------------------------------------------------------|--------------------------------------------|---------|------------------------------------------------------------------------------------------------------------------------------------------------------------------------------|--------|------------------------------------------------------------------------------------------------------------------------------------------------------------------------------------------------------------------------------------------------------------------------------------------------------------------------------------|----------------------------|
|                        |                                                            |                                            |         | focussing on personally valued goals rather than professional goals;<br><br><i>Then</i> SUs will trust the CP, talk openly with them and have a positive experience of care. |        |                                                                                                                                                                                                                                                                                                                                    |                            |
|                        | SU perceptions and experience                              | SU-CP interactions                         |         |                                                                                                                                                                              | 427a   | If SU experience a sense of authentic, human connection or friendship with practitioners, which may be founded in shared experience or background and some degree of mutuality and develops over time then SUs are more likely to trust and open up and will be empowered and have positive experience of care.<br><br>[Also in 7] | SU, 8                      |
|                        | Appropriate support, identifies & meets needs (responsive) | Practitioner behaviour and characteristics |         |                                                                                                                                                                              | 415a   | [Also in 7]<br><br>If mental health practitioners are gentle caring, compassionate, supportive, empathic and seem to go 'above and beyond' then service users feel they can talk openly and will be listened to, so SU recovery is supported and stability is maintained.                                                          | SU, 8                      |
|                        | Appropriate support, identifies & meets needs (responsive) | practitioner characteristics & behaviour   |         |                                                                                                                                                                              | 425a   | [Also in 7.]<br><br>If practitioners make SU feel relaxed & safe, follow through on their commitments and treat them as people, providing a consistent relationship over a period of time, then SUs will trust them, feel able to open up and recovery will be supported.                                                          | SU, 8                      |
| 6                      | SU experience of care (positive)                           | SU-CP interactions                         |         |                                                                                                                                                                              | 427b   | If SU experience a sense of authentic, human connection or friendship with practitioners, which may be founded in shared experience or background and some degree of mutuality and develops over time then SUs are more likely to trust and open up and will be empowered and have positive                                        | SU, 8                      |

| Macro/Meso/Micro level | Outcome ( <i>then</i> ) category                           | Context/Mechanism ( <i>if</i> ) category              | CES No. | Consolidated Candidate Theory                                                                                                                                                                                                                                                                    | ES No. | ESs                                                                                                                                                                                                                                                                                                                    | stakeholder, source number |
|------------------------|------------------------------------------------------------|-------------------------------------------------------|---------|--------------------------------------------------------------------------------------------------------------------------------------------------------------------------------------------------------------------------------------------------------------------------------------------------|--------|------------------------------------------------------------------------------------------------------------------------------------------------------------------------------------------------------------------------------------------------------------------------------------------------------------------------|----------------------------|
|                        |                                                            |                                                       |         |                                                                                                                                                                                                                                                                                                  |        | experience of care.                                                                                                                                                                                                                                                                                                    |                            |
| 6                      | SUs experience of care (positive)                          | SU-CP interactions                                    |         |                                                                                                                                                                                                                                                                                                  | 430b   | If practitioners take a collaborative approach to SUs, working 'as a team', involving SUs in decisions, giving choices and negotiating about disagreement, focussing on personally valued goals rather than professional goals then this is experienced as good care and leads to better adherence to treatment plans. | SU, 8                      |
| 6                      | SU experience of care (negative)                           | SU—practitioner interactions                          |         |                                                                                                                                                                                                                                                                                                  | 426b   | If SUs do not trust practitioners then they won't open up or follow their advice and care will not be appropriate.                                                                                                                                                                                                     | SU, 8                      |
| 6                      | Experience of care (negative)                              | Practitioner characteristics / attitudes              |         |                                                                                                                                                                                                                                                                                                  | 417a   | If mental health practitioners are callous, negligent and self-interested then SU feel neglected and angry and their recovery is not supported.                                                                                                                                                                        | SU, 8                      |
| 6                      | SUs experience of care (negative)                          | SU-practitioner interactions / practitioner behaviour |         |                                                                                                                                                                                                                                                                                                  | 433a   | If practitioners take an authoritarian, controlling, expert-driven approach, taking actions without involving the SU or relying purely on a medical model then SU feel angry, helpless and unsafe and experience of care is negative.                                                                                  | SU, 8                      |
| 6                      | SU experiences of care: positive                           | Organisational context                                |         |                                                                                                                                                                                                                                                                                                  | 369    | If mental health services are available and responsive (easy to access and take people seriously) then services users feel well supported and safe.                                                                                                                                                                    | SU, 8                      |
| 6                      | SU experiences of care: negative                           | Organisational context                                |         |                                                                                                                                                                                                                                                                                                  | 370    | If mental health services are hard to access, only offer time limited contact or do not seem to take people seriously, service users feel neglected, unsafe and that care is poor.                                                                                                                                     | SU, 8                      |
|                        | Appropriate support, identifies & meets needs (responsive) | practitioner interactions                             | 53      | If the correct decisions are to be reached for appropriate individualised P2 care delivery <i>then</i> some discussion between professionals may happen quickly between two individuals whilst elsewhere prolonged negotiation across multi-professional staff may be required. <i>[reverse]</i> | 360    | If the correct decisions are to be reached for appropriate individualised P2 care delivery <i>then</i> some discussion between professionals may happen quickly between two individuals whilst elsewhere prolonged negotiation across multi-professional staff may be required. <i>[reverse]</i>                       | key leader, 7              |

| Macro/Meso/Micro level | Outcome ( <i>then</i> ) category                                          | Context/Mechanism ( <i>if</i> ) category   | CES No. | Consolidated Candidate Theory                                                                                                                                                                                                                                                 | ES No. | ESs                                                                                                                                                                                                         | stakeholder, source number |
|------------------------|---------------------------------------------------------------------------|--------------------------------------------|---------|-------------------------------------------------------------------------------------------------------------------------------------------------------------------------------------------------------------------------------------------------------------------------------|--------|-------------------------------------------------------------------------------------------------------------------------------------------------------------------------------------------------------------|----------------------------|
|                        | Appropriate support, identifies & meets needs (responsive), managing risk | Psychiatry support                         | 54      |                                                                                                                                                                                                                                                                               | 231    | If CC is based on primary care for those with SMI AND a psychiatrist is available to support decisions, then care would be (safe/appropriate).                                                              | key leader, 7              |
|                        | Appropriate support, identifies & meets needs (responsive), managing risk | Appropriate recipients of the intervention | 55      |                                                                                                                                                                                                                                                                               | 251    | If you have a skilled well established service, then individuals with reasonable functioning who may once have been classified as high risk can be seen long/term/for life in a primary care based service. | key leader, 7              |
|                        | Managing risk                                                             | Shared understanding                       | 56      | If practitioners and SUs balance hope and realism, so that practitioners take over responsibility from SUs when necessary, then it is possible to constructively manage risks                                                                                                 | S36    | If practitioners do not take over responsibility from service users when needed, <i>then</i> the safety of service users and/or others is put at risk                                                       | SU, 4                      |
|                        | Managing risk                                                             | CP—SU interactions                         |         |                                                                                                                                                                                                                                                                               | S42    | If the practitioner and service user balance hope, aspiration, expectation and realism, then it is possible to constructively manage risks                                                                  | practitioners, 2           |
| 6                      | SU experiences of care: negative                                          | Organisational context                     | 57      | If service users have continuity of care, seeing the same practitioner over longer periods, or handover between practitioners is well managed then SU have a positive experience of care,<br><br>But<br><br>If these things do not happen, the SU experiences care negatively | 364    | If there are frequent changes of practitioner, due to high staff turnover, reorganisation of services, or transfer between services, then service users have negative experiences of care                   | SU, 8                      |
| 6                      | SU experiences of care: positive                                          | Organisational context                     |         |                                                                                                                                                                                                                                                                               | 365    | If service users have continuity of care, seeing the same practitioner over longer periods, or handover between practitioners is well managed then SU have a positive experience of care                    | SU, 8                      |
| 6                      | SU experiences of care: positive                                          | Organisational context                     | 58      | If mental health services are available and responsive (easy to access) then services users feel well supported and safe,<br><br>But                                                                                                                                          | 369    | If mental health services are available and responsive (easy to access and take people seriously) then services users feel well supported and safe.                                                         | SU, 8                      |

| Macro/Meso/Micro level | Outcome ( <i>then</i> ) category  | Context/Mechanism ( <i>if</i> ) category | CES No. | Consolidated Candidate Theory                                                                                                                                                                                                                                                                                                                                                            | ES No. | ESs                                                                                                                                                                                | stakeholder, source number |
|------------------------|-----------------------------------|------------------------------------------|---------|------------------------------------------------------------------------------------------------------------------------------------------------------------------------------------------------------------------------------------------------------------------------------------------------------------------------------------------------------------------------------------------|--------|------------------------------------------------------------------------------------------------------------------------------------------------------------------------------------|----------------------------|
|                        |                                   |                                          |         | If mental health services are hard to access, resources are limited, service users feel neglected, unsafe and that care is poor.                                                                                                                                                                                                                                                         |        |                                                                                                                                                                                    |                            |
| 6                      | SU experiences of care: negative  | Organisational context                   |         |                                                                                                                                                                                                                                                                                                                                                                                          | 370    | If mental health services are hard to access, only offer time limited contact or do not seem to take people seriously, service users feel neglected, unsafe and that care is poor. | SU, 8                      |
| 6                      | SU experiences of care: negative  | Organisational context                   |         |                                                                                                                                                                                                                                                                                                                                                                                          | 373    | If there are reduced resources then service users may feel unsupported and lose confidence in mental health services                                                               | SU, 8                      |
| 6                      | SU experiences of care: positive  | Organisational context                   | 59      | <p>If there is good communication within and between services, which includes SUs, about the SUs needs, options &amp; plans to address them then this is experienced as good care,</p> <p>But</p> <p>If there is poor communication within and between services, which does not include SUs then SUs experience frustration, feel abandoned and this is as experienced as poor care.</p> | 375    | If there is good communication within and between services, which includes SUs, about the SUs needs, options & plans to address them then this is experienced as good care.        | SU, 8                      |
| 6                      | SU experiences of care: negative  | Organisational context                   |         |                                                                                                                                                                                                                                                                                                                                                                                          | 376    | If there is poor communication within and between services, which does not include SUs then SUs experience frustration, feel abandoned and this is as experienced as poor care.    | SU, 8                      |
| 6                      | SUs experience of care (positive) | Service location                         | 60      |                                                                                                                                                                                                                                                                                                                                                                                          | 378    | If contact with practitioners is in a normalising, social setting then service users experience this as positive.                                                                  | SU, 8                      |
| 6                      | SUs experience of care (positive) | Care processes: review                   | 61      | <p>If there is regular review of service users' needs, including prescriber review of how medication is affecting them, then new needs are identified and service users experience this as helpful,</p> <p>But</p> <p>If regular review (including medication) does not take place then care is not adequate and treatment is not optimal.</p>                                           | 380    | If there is regular review of service users' needs, including prescriber review of how medication is affecting them, then service users experience this as helpful.                | SU, 8                      |

| Macro/Meso/Micro level | Outcome ( <i>then</i> ) category              | Context/Mechanism ( <i>if</i> ) category      | CES No. | Consolidated Candidate Theory                                                                                                                                                                                                                                                                                                                                                                                                               | ES No. | ESs                                                                                                                                                                                                                                                                                                      | stakeholder, source number |
|------------------------|-----------------------------------------------|-----------------------------------------------|---------|---------------------------------------------------------------------------------------------------------------------------------------------------------------------------------------------------------------------------------------------------------------------------------------------------------------------------------------------------------------------------------------------------------------------------------------------|--------|----------------------------------------------------------------------------------------------------------------------------------------------------------------------------------------------------------------------------------------------------------------------------------------------------------|----------------------------|
| 6                      | SU experience of care (negative)              | Care processes: review                        |         |                                                                                                                                                                                                                                                                                                                                                                                                                                             | 381    | If regular review (including medication) does not take place then care is not adequate and treatment is not optimal.                                                                                                                                                                                     | SU, 8                      |
|                        | Appropriate support, identifies & meets needs | Review                                        |         |                                                                                                                                                                                                                                                                                                                                                                                                                                             | 253    | If some form of specialist review is done annually, then it will ensure new needs are identified and optimal treatment can be considered.                                                                                                                                                                | key leader, 7              |
| 6                      | SU experience of care (negative)              | Care processes: step down                     | 62      | <p>If step down to less intense care is based on reduced resources, happens suddenly and the service user does not understand the rationale, then service users may experience anxiety, lose trust and feel they have to fight for help,</p> <p>But</p> <p>If step down to less intense care is gradual, reflects improvements in the service user's wellbeing and is agreed with them, then service users experience this as positive.</p> | 382    | If step down to less intense care is based on reduced resources, happens suddenly and the service user does not understand the rationale, then service users may experience anxiety, lose trust and feel they have to fight for help.                                                                    | SU, 8                      |
| 6                      | SUs experience of care (positive)             | Care processes: step down                     |         |                                                                                                                                                                                                                                                                                                                                                                                                                                             | 383    | If step down to less intense care is gradual, reflects improvements in the service user's wellbeing and is agreed with them, then service users experience this as positive.                                                                                                                             | SU, 8                      |
| 6                      | SUs experience of care negative               | SU-CP interactions<br>Organisational policies |         |                                                                                                                                                                                                                                                                                                                                                                                                                                             | 394a   | If discharge is sudden, especially after many years in services, based on service needs rather than clinical needs and SUs are told that they are being discharged rather than involved in a process of negotiation and preparation then this is experienced as poor care and can lead to deterioration. | SU, 8                      |
| 6                      | Experience of care (positive)                 | SU-CP interactions                            |         |                                                                                                                                                                                                                                                                                                                                                                                                                                             | 396a   | If discharge is based on genuine improvement in SUs wellbeing, is negotiated with the SU and they feel it is appropriate for them, then it is likely to be experienced as positive and lead to establishing a preferred identity.                                                                        | SU, 8                      |
| 6                      | SUs experience of care (positive)             | Care processes: step-up                       | 63      | If there is increased access at times of crisis (or additional need) to company and opportunities to talk (e.g. CPs, respite, crisis house, Soteria house, increased mental health support),                                                                                                                                                                                                                                                | 385    | If there is increased access at times of crisis to company and opportunities to talk (e.g. respite, crisis house, Soteria house) then SUs experience this as helpful.                                                                                                                                    | SU, 8                      |

| Macro/Meso/Micro level | Outcome ( <i>then</i> ) category                           | Context/Mechanism ( <i>if</i> ) category | CES No. | Consolidated Candidate Theory                                                                                                                                                                                                                                                                                                                                                                                                                                                                                                                                                                                                                                                                                                                                                                                         | ES No. | ESs                                                                                                                                                                                                                 | stakeholder, source number |
|------------------------|------------------------------------------------------------|------------------------------------------|---------|-----------------------------------------------------------------------------------------------------------------------------------------------------------------------------------------------------------------------------------------------------------------------------------------------------------------------------------------------------------------------------------------------------------------------------------------------------------------------------------------------------------------------------------------------------------------------------------------------------------------------------------------------------------------------------------------------------------------------------------------------------------------------------------------------------------------------|--------|---------------------------------------------------------------------------------------------------------------------------------------------------------------------------------------------------------------------|----------------------------|
|                        |                                                            |                                          |         | <p>CPs and/or crisis teams provide responsive, individualised care and do not impose a strategy, and or</p> <p>medication is provided in a timely way and helps to stabilise the SU's mental state, then SUs experience this as helpful;</p> <p>At the same time,</p> <p>When some SUs lack awareness of the way in which their mental health is deteriorating and medication is given against their will, this can be experienced as helpful by SUs.</p> <p>But,</p> <p>If practitioners pressure people to talk during a crisis or additional need when they do not feel ready, and/or</p> <p>GPs and other non-mental health services (such as A&amp;E) don't know how to respond, for example refer on without understanding what each service should provide to help, then SUs experience this as unhelpful.</p> |        |                                                                                                                                                                                                                     |                            |
| 6                      | SUs experience of care (positive)                          | SU-CP interactions: crisis               |         |                                                                                                                                                                                                                                                                                                                                                                                                                                                                                                                                                                                                                                                                                                                                                                                                                       | 404    | IF SUs lack awareness of the way in which their mental health is deteriorating and medication is given against their will, then this can be experienced as helpful by SUs.                                          | SU, 8                      |
|                        | Appropriate support, identifies & meets needs (responsive) | risk                                     |         |                                                                                                                                                                                                                                                                                                                                                                                                                                                                                                                                                                                                                                                                                                                                                                                                                       | 358    | <i>If</i> mental health crisis are to appropriately supported for P2 service users <i>then</i> the P2 protocol needs governance arrangements that allow service users to move across to appropriate secondary care. | key leader, 7              |
|                        | Appropriate support, identifies & meets needs (responsive) | risk                                     |         |                                                                                                                                                                                                                                                                                                                                                                                                                                                                                                                                                                                                                                                                                                                                                                                                                       | 235    | If the care manager is alert to relapses, especially in bipolar, then care can be more reactive.                                                                                                                    | key leader, 7              |
| 6                      | SUs experience of care (positive)                          | Psychiatric services                     |         |                                                                                                                                                                                                                                                                                                                                                                                                                                                                                                                                                                                                                                                                                                                                                                                                                       | 390    | If there is a psychiatric liaison team who can give the SU quick access to increased mental health support then this is experienced as helpful.                                                                     | SU, 8                      |

| Macro/Meso/Micro level | Outcome ( <i>then</i> ) category  | Context/Mechanism ( <i>if</i> ) category                   | CES No. | Consolidated Candidate Theory                                                                                                                                                                                                                        | ES No. | ESs                                                                                                                                                                                                                                                    | stakeholder, source number |
|------------------------|-----------------------------------|------------------------------------------------------------|---------|------------------------------------------------------------------------------------------------------------------------------------------------------------------------------------------------------------------------------------------------------|--------|--------------------------------------------------------------------------------------------------------------------------------------------------------------------------------------------------------------------------------------------------------|----------------------------|
| 6                      | SU experience of care (negative)  | SU-CP interactions – crisis                                |         |                                                                                                                                                                                                                                                      | 386    | If practitioners pressure people to talk during a crisis when they do not feel ready then SU experience this as unhelpful.                                                                                                                             | SU, 8                      |
| 6                      | SU experience of care (negative)  | GP / primary care knowledge – crisis                       |         |                                                                                                                                                                                                                                                      | 387    | If GPs and other non-mental health services (such as A&E) don't know how to respond at times of crisis service users experience this as unhelpful.                                                                                                     | SU, 8                      |
| 6**                    | SU experience of care (negative)  | Other services info & knowledge – crisis                   |         |                                                                                                                                                                                                                                                      | 388    | If services do not know what each service should provide to help manage crisis and refer SUs on then SU experience this as unhelpful.                                                                                                                  | SU, 8                      |
| 6                      | SUs experience of care (positive) | SU-CP interaction / other services info & knowledge—crisis |         |                                                                                                                                                                                                                                                      | 392    | If crisis teams provide responsive, individualised care and do not impose a strategy, then this is experienced as supportive during crisis.                                                                                                            | SU, 8                      |
| 6                      | SUs experience of care (positive) | Effective medication                                       |         |                                                                                                                                                                                                                                                      | 397    | If medication is provided in a timely way and helps to stabilise the SU's mental state then this is experienced as helpful.                                                                                                                            | SU, 8                      |
| 6                      | SUs experience of care (positive) | SU knowledge of services                                   | 64      | If SUs are provided support for self-management of their mental health, including information about the role of different services and how to access them, and/or<br><br>SUs are assertive, then they are more able to access the support they want. | 389    | If SUs are themselves aware of the role of different services and how to access them then this is helpful.                                                                                                                                             | SU, 8                      |
| 6                      | SUs experience of care (positive) | SU knowledge & skills                                      |         |                                                                                                                                                                                                                                                      | 437    | If SUs are assertive they are more able to access the support they want.                                                                                                                                                                               | SU, 8                      |
| 6                      | Experience of care (positive)     | SU-CP interactions<br><br>Practitioner knowledge           |         |                                                                                                                                                                                                                                                      | 410a   | If SUs are provided support for self-management of their mental health, such as information, coping strategies, measures, community based groups, then this empowers SUs, supports their wellbeing and recovery, and is experienced as helpful by SUs. | SU, 8                      |
| 6                      | SUs experience of care (negative) | Medication vs other therapies                              | 65      | If practitioners including GPs are well informed and/or well qualified about mental health and medication but also honest about the limits of their knowledge,                                                                                       | 398    | If too much emphasis is given to medication and support for self-management and talking therapies are not provided then this is experienced as unhelpful.                                                                                              | SU, 8                      |

| Macro/Meso/Micro level | Outcome ( <i>then</i> ) category | Context/Mechanism ( <i>if</i> ) category | CES No. | Consolidated Candidate Theory                                                                                                                                                                                                                                                                                                                                                                                                                                                                                                                                                                                                                                                                                                                                                                                                                                                                                                                                                                                                                                                                                                                                                                                                                | ES No. | ESs | stakeholder, source number |
|------------------------|----------------------------------|------------------------------------------|---------|----------------------------------------------------------------------------------------------------------------------------------------------------------------------------------------------------------------------------------------------------------------------------------------------------------------------------------------------------------------------------------------------------------------------------------------------------------------------------------------------------------------------------------------------------------------------------------------------------------------------------------------------------------------------------------------------------------------------------------------------------------------------------------------------------------------------------------------------------------------------------------------------------------------------------------------------------------------------------------------------------------------------------------------------------------------------------------------------------------------------------------------------------------------------------------------------------------------------------------------------|--------|-----|----------------------------|
|                        |                                  |                                          |         | <p>practitioners with specialist knowledge of mental health conditions share this knowledge with SUs to support SUs to understand themselves, and/or allow SUs to negotiate increases and decreases of dose, including coming off medication altogether,</p> <p>appropriate therapies are available alongside medication and self-management training, and/or</p> <p>mental health practitioners are not compassionate but adhere to practice standards</p> <p><i>then</i> this is experienced as helpful,</p> <p>But,</p> <p>If practitioners do not have qualifications and/or knowledge about mental health,</p> <p>too much emphasis is given to medication and support for self-management and talking therapies are not provided, are limited in type (eg therapy is provided but it is not relevant to the difficulties that the SU is experiencing), the therapy is time limited or there are long waiting lists,</p> <p>practitioners do not give SUs information and explanations,</p> <p>focus on problems,</p> <p>are risk averse, and/or</p> <p>do not have a full, accurate understanding of the person,</p> <p>then SUs do not feel safe, their mental health deteriorates and/or they have negative experiences of care.</p> |        |     |                            |

| Macro/Meso/Micro level | Outcome ( <i>then</i> ) category  | Context/Mechanism ( <i>if</i> ) category               | CES No. | Consolidated Candidate Theory                                                                                                                          | ES No. | ESs                                                                                                                                                                                                                                                                                                     | stakeholder, source number |
|------------------------|-----------------------------------|--------------------------------------------------------|---------|--------------------------------------------------------------------------------------------------------------------------------------------------------|--------|---------------------------------------------------------------------------------------------------------------------------------------------------------------------------------------------------------------------------------------------------------------------------------------------------------|----------------------------|
|                        |                                   |                                                        |         | At the same time, If practitioners do not have mental health qualifications then they are more approachable and more likely to support peer processes. |        |                                                                                                                                                                                                                                                                                                         |                            |
| 6                      | SUs experience of care (positive) | SU-CP interactions: medication                         |         |                                                                                                                                                        | 402    | If SU feel in charge of decisions about their medication and negotiate increases and decreases of dose, including coming off medication altogether then SUs experience this as helpful.                                                                                                                 | SU, 8                      |
| 6                      | SUs experience of care (positive) | Organisational roles: medication                       |         |                                                                                                                                                        | 405    | If mental health medication is available from the GP then this is experienced as helpful by SUs.                                                                                                                                                                                                        | SU, 8                      |
| 6                      | SUs experience of care (negative) | Organisational policies & processes: medication        |         |                                                                                                                                                        | 406    | If certain medications are prescribed then SUs are retained in secondary services for longer (and this is unhelpful).                                                                                                                                                                                   | SU, 8                      |
| 6                      | SUs experience of care (negative) | Organisational context, resources: therapy resources   |         |                                                                                                                                                        | 408    | If there are limited therapy resources, leading to therapies being time limited and long waiting lists then this is experienced as unhelpful by SUs.                                                                                                                                                    | SU, 8                      |
| 6                      | SUs experience of care (negative) | Organisational context, resources                      |         |                                                                                                                                                        | 409    | If therapy is provided but it is not relevant to the difficulties that the SU is experiencing then this is not experienced as helpful.                                                                                                                                                                  | SU, 8                      |
| 6                      | SU experiences of care (positive) | SU-CP interactions                                     |         |                                                                                                                                                        | 453    | If SUs are offered appropriate support to address problematic substance use this is experienced as good care.                                                                                                                                                                                           | SU, 8                      |
| 6                      | SUs experience of care (positive) | Practitioner knowledge / SU-CP interactions            |         |                                                                                                                                                        | 399    | If practitioners are well informed about medication but also honest about the limits of their knowledge then this is experienced as helpful.                                                                                                                                                            | SU, 8                      |
| 6                      | SUs experience of care (positive) | Practitioner characteristics & behaviour               |         |                                                                                                                                                        | 416    | If mental health practitioners are not compassionate but adhere to practice standards then this is valued by SUs.                                                                                                                                                                                       | SU, 8                      |
| 6                      | SUs experience of care (positive) | Practitioner knowledge<br>Practitioner-SU interactions |         |                                                                                                                                                        | 418    | If mental health practitioners have specialist knowledge of mental health conditions, but are aware of the limits of their knowledge and share this knowledge with SUs to support SUs to understand themselves then SUs feel confident in the care they are receiving and experience support as useful. | SU, 8                      |
| 6                      | SUs experience of care (negative) | Practitioner knowledge & skills                        |         |                                                                                                                                                        | 422    | If mental health practitioners focus on problems or do not have a full, accurate understanding of the person then this leads to poor care.                                                                                                                                                              | SU, 8                      |
| 6                      | SUs experience of care (positive) | Practitioner knowledge and skills                      |         |                                                                                                                                                        | 423    | If practitioners are qualified mental health workers then they provide a better quality service.                                                                                                                                                                                                        | SU, 8                      |

| Macro/Meso/Micro level | Outcome ( <i>then</i> ) category  | Context/Mechanism ( <i>if</i> ) category                 | CES No. | Consolidated Candidate Theory                                                                                                                                                                                                                                | ES No. | ESs                                                                                                                                                                                                                                                                                                                                                                                                                | stakeholder, source number |
|------------------------|-----------------------------------|----------------------------------------------------------|---------|--------------------------------------------------------------------------------------------------------------------------------------------------------------------------------------------------------------------------------------------------------------|--------|--------------------------------------------------------------------------------------------------------------------------------------------------------------------------------------------------------------------------------------------------------------------------------------------------------------------------------------------------------------------------------------------------------------------|----------------------------|
| 6                      | SUs experience of care (positive) | Practitioner knowledge and skills                        |         |                                                                                                                                                                                                                                                              | 424    | If practitioners do not have mental health qualifications then they are more approachable and more likely to support peer processes.                                                                                                                                                                                                                                                                               | SU, 8                      |
| 6                      | SUs experience of care (negative) | Practitioner attitudes—risk                              |         |                                                                                                                                                                                                                                                              | 434    | If mental health practitioners are risk averse then SU do not feel safe and have negative experiences of care.                                                                                                                                                                                                                                                                                                     | SU, 8                      |
| 6                      | SUs experience of care (negative) | Practitioner knowledge & skills (lack)                   |         |                                                                                                                                                                                                                                                              | 420a   | If mental health practitioners do not give SU information and explanations, apply single models rigidly or have limited knowledge of alternative explanations then this can lead to deterioration in SU mental health and is experienced as unhelpful by SUs.                                                                                                                                                      | SU, 8                      |
| 6                      | SUs experience of care (positive) | GP-SU interactions<br>GP knowledge                       |         |                                                                                                                                                                                                                                                              | 411    | If SUs have a good relationship with their GP and / or practice nurse and their GP is helpful to them, by referring appropriately, negotiating about medication, allowing longer appointments for mental health issues, responding sensitively to physical health issues and concerns, especially in the absence of secondary care input, then this is experienced as good care and meets the need for continuity. | SU, 8                      |
| 6                      | SUs experience of care (negative) | GP knowledge (lack)                                      |         |                                                                                                                                                                                                                                                              | 413    | IF GPs do not understand mental health in general or the needs of the individual SU, only provide short appointments and do not know how to respond in crisis or access relevant services then this is experienced as unhelpful by SUs.                                                                                                                                                                            | SU, 8                      |
| 6                      | SUs experience of care (positive) | GP knowledge & skills                                    | 66      | If GP surgery contexts are relevant to the particular needs of people with severe mental health problems, for example receptionists are sensitive towards them and information about mental health is displayed, then this is experienced as helpful by SUs. | 412    | If GP receptionists are sensitive to the particular needs of people with severe mental health problems then this is experienced as helpful by SUs.                                                                                                                                                                                                                                                                 | SU, 8                      |
| 6                      | SUs experience of care (negative) | Physical environment: GP's surgeries posting information |         |                                                                                                                                                                                                                                                              | 414    | If GP surgeries do not display information about mental health this gives the impression that it is not a service that provides mental health care.                                                                                                                                                                                                                                                                | SU, 8                      |
| 6                      | SU experience of care (negative)  | SU-practitioner interaction                              | 67      | If SUs experience a lack of connection with practitioners, possibly related to a lack of                                                                                                                                                                     | 428    | If SUs experience a lack of connection with practitioners, possibly related to a lack of shared experience or background, then SUs experience this as unhelpful.                                                                                                                                                                                                                                                   | SU, 8                      |

| Macro/Meso/Micro level                                                                                | Outcome ( <i>then</i> ) category                           | Context/Mechanism ( <i>if</i> ) category                    | CES No. | Consolidated Candidate Theory                                                                                                                                                                                                                                                  | ES No. | ESs                                                                                                                                                                      | stakeholder, source number |
|-------------------------------------------------------------------------------------------------------|------------------------------------------------------------|-------------------------------------------------------------|---------|--------------------------------------------------------------------------------------------------------------------------------------------------------------------------------------------------------------------------------------------------------------------------------|--------|--------------------------------------------------------------------------------------------------------------------------------------------------------------------------|----------------------------|
|                                                                                                       |                                                            |                                                             |         | shared experience or background, then SUs experience this as unhelpful,<br><br>But at the same time,<br><br>If SUs and practitioners come from the same cultural background this can also create conflicts.                                                                    |        |                                                                                                                                                                          |                            |
| 6                                                                                                     | SU experience of care (negative)                           | SU-practitioner interaction                                 |         |                                                                                                                                                                                                                                                                                | 429    | If SUs and practitioners come from the same cultural background this can create conflicts (not clear why, maybe if they have different roles or status in that culture?) | SU, 8                      |
| 6                                                                                                     | SUs experience of care (positive)                          | Organisational policies & processes                         | 68      |                                                                                                                                                                                                                                                                                | 435    | If organisations involve SUs in service design in a meaningful, non-tokenistic way then this will lead to improved care                                                  | SU, 8                      |
| 6                                                                                                     | SU experiences of care (positive)                          | SU-practitioner interactions                                | 69      | If SUs receive appropriate professional support to claim all the benefits they are entitled to, then this is experienced as helpful by SUs.                                                                                                                                    | 446    | If SUs receive appropriate professional support to claim all the benefits they are entitled to, then this is experienced as helpful by SUs.                              | SU, 8                      |
| 6                                                                                                     | SU experiences of care (negative)                          | SU-practitioner interactions                                |         |                                                                                                                                                                                                                                                                                | 449    | If SU receive the wrong advice or miss out on benefits they are entitled to, this is experienced as unhelpful by SUs.                                                    | SU, 8                      |
| 6                                                                                                     | SUs experience of care (negative)                          | Practitioner behaviour<br>Practitioner –family interactions | 70      |                                                                                                                                                                                                                                                                                | 441a   | Where SUs are consenting, if family and friends are not offered support or involvement by mental health services then this is experienced as inadequate care.            | SU, 8                      |
| <b>7. Service users: perceptions, understanding, skills and/or mental and physical health (micro)</b> |                                                            |                                                             |         |                                                                                                                                                                                                                                                                                |        |                                                                                                                                                                          |                            |
| <b>Therapeutic relationship</b>                                                                       | SU perceptions and experience, empowerment, identity, hope | SU perceptions                                              | 71      | If mental health practitioners are gentle caring, compassionate, supportive, non-judgmental, empathic and seem to go ‘above and beyond’,<br><br>make SU feel relaxed & safe, follow through on their commitments and treat them as people, providing a consistent relationship | 426a   | If SUs do not trust practitioners then they won’t open up or follow their advice and care will not be appropriate.<br><br>[also in 6.]                                   | SU, 8                      |

| Macro/Meso/Micro level | Outcome ( <i>then</i> ) category                                                            | Context/Mechanism ( <i>if</i> ) category   | CES No. | Consolidated Candidate Theory                                                                                                                                                                                                                                                                                                                                                                                                                                              | ES No. | ESs                                                                                                                                                                                                                                                                                                                     | stakeholder, source number |
|------------------------|---------------------------------------------------------------------------------------------|--------------------------------------------|---------|----------------------------------------------------------------------------------------------------------------------------------------------------------------------------------------------------------------------------------------------------------------------------------------------------------------------------------------------------------------------------------------------------------------------------------------------------------------------------|--------|-------------------------------------------------------------------------------------------------------------------------------------------------------------------------------------------------------------------------------------------------------------------------------------------------------------------------|----------------------------|
|                        |                                                                                             |                                            |         | <p>over a period of time, and/or</p> <p>respect service users' multiple aspects of identity,</p> <p><i>then</i> service users are more likely to trust and feel they can talk openly and will be listened to,</p> <p>service users are provided with a 'normalising' sense of positivity that supports their self-esteem, and/or</p> <p>SU recovery is supported.</p> <p>But,</p> <p>If SUs do not trust practitioners then they won't open up or follow their advice.</p> |        |                                                                                                                                                                                                                                                                                                                         |                            |
|                        | SU identity, self-esteem, self-understandings (including meaning of symptoms) and/or stigma | CP—SU interactions                         |         |                                                                                                                                                                                                                                                                                                                                                                                                                                                                            | S21    | If practitioners respect service users' multiple aspects of identity, then the service user's identity as a worthwhile person will be strengthened                                                                                                                                                                      | SU, 1                      |
|                        | SU identity, self-esteem, self-understandings (including meaning of symptoms) and/or stigma | SU—practitioner interactions               |         |                                                                                                                                                                                                                                                                                                                                                                                                                                                                            | S8     | If practitioners demonstrate non-judgmental, positive attitudes toward service users, then service users are provided with a 'normalising' sense of positivity that supports their self-esteem                                                                                                                          | SU, 4                      |
|                        | SU perceptions and experience                                                               | Practitioner behaviour and characteristics |         |                                                                                                                                                                                                                                                                                                                                                                                                                                                                            | 415a   | <p>If mental health practitioners are gentle caring, compassionate, supportive, empathic and seem to go 'above and beyond' then service users feel they can talk openly and will be listened to, SU recovery is supported and stability is maintained and this is experienced positively by SUs</p> <p>[also in 6.]</p> | SU, 8                      |
|                        | SU perceptions and experience                                                               | SU-CP interactions                         |         |                                                                                                                                                                                                                                                                                                                                                                                                                                                                            | 427a   | If SUs experience a sense of authentic, human connection or friendship with practitioners, which may be founded in shared experience or background and some                                                                                                                                                             | SU, 8                      |

| Macro/Meso/Micro level | Outcome ( <i>then</i> ) category                      | Context/Mechanism ( <i>if</i> ) category                        | CES No. | Consolidated Candidate Theory                                                                                                                                                                                                                                                                                                     | ES No. | ESs                                                                                                                                                                                                                                                                                                                                                                                                               | stakeholder, source number |
|------------------------|-------------------------------------------------------|-----------------------------------------------------------------|---------|-----------------------------------------------------------------------------------------------------------------------------------------------------------------------------------------------------------------------------------------------------------------------------------------------------------------------------------|--------|-------------------------------------------------------------------------------------------------------------------------------------------------------------------------------------------------------------------------------------------------------------------------------------------------------------------------------------------------------------------------------------------------------------------|----------------------------|
|                        |                                                       |                                                                 |         |                                                                                                                                                                                                                                                                                                                                   |        | degree of mutuality and develops over time then SUs are more likely to trust and open up and will be empowered and have positive experience of care.<br><br>[also in 6]                                                                                                                                                                                                                                           |                            |
|                        | SU perceptions and experience                         | practitioner characteristics & behaviour                        |         |                                                                                                                                                                                                                                                                                                                                   | 425a   | If practitioners make SU feel relaxed & safe, follow through on their commitments and treat them as people, providing a consistent relationship over a period of time, then SUs will trust them, feel able to open up and recovery will be supported.<br><br>[also in 6.]                                                                                                                                         | SU, 8                      |
|                        | SU empowerment, agency, confidence and/or self-belief | Respect/acceptance<br><br>Strengths<br><br>Shared understanding |         |                                                                                                                                                                                                                                                                                                                                   | 11     | <i>[Also SU Meaning]</i><br><br><i>If</i> health care practitioners demonstrate non-judgmental, positive attitudes towards service users, focusing on their resilience, strengths and performance, and acknowledging their multiple identities, supporting service users' self-acceptance, self-confidence and self-belief, <i>then</i> such self-perceptions can act as internal answers and drivers to recovery | SU, 4                      |
| <b>SU engagement</b>   | SU perceptions: retention                             | CP skills                                                       | 72      | If SUs have a choice in relation to how they are contacted (face-to-face, over the phone etc..), a guarantee that if they slip out of contact someone will try and reengage them unless this support is explicitly rejected, and if sensitivity around vocabulary is maintained, then engagement is more likely to be maintained. | 252    | If CPs work hard at retaining contact, then people with schizophrenia will be reassured that if they start slipping out of contact, then someone will respond by trying to get them back                                                                                                                                                                                                                          | key leader, 7              |
|                        | SU perceptions: retention                             | CP skills                                                       |         |                                                                                                                                                                                                                                                                                                                                   | 301    | <i>If</i> CPs do not give up on service users and continue to follow them up assertively to ensure the follow up occurs, unless their support is explicitly rejected, <i>then</i> service users are more likely to remain engaged in P2                                                                                                                                                                           | key leader, 7              |
|                        | SU perceptions: retention                             | CP skills<br><br>Organisation: roles                            |         |                                                                                                                                                                                                                                                                                                                                   | 249    | [also in 6]<br>If a case manager has good communication skills AND a role to follow up, then individuals are more likely to be retained in care and get the support they need.                                                                                                                                                                                                                                    | key leader, 7              |

| Macro/Meso/Micro level               | Outcome ( <i>then</i> ) category                                      | Context/Mechanism ( <i>if</i> ) category | CES No. | Consolidated Candidate Theory                                                                                                                                                                                                                                                                                                                                                                                                                                                                                   | ES No. | ESs                                                                                                                                                                                                                                                                                                                 | stakeholder, source number |
|--------------------------------------|-----------------------------------------------------------------------|------------------------------------------|---------|-----------------------------------------------------------------------------------------------------------------------------------------------------------------------------------------------------------------------------------------------------------------------------------------------------------------------------------------------------------------------------------------------------------------------------------------------------------------------------------------------------------------|--------|---------------------------------------------------------------------------------------------------------------------------------------------------------------------------------------------------------------------------------------------------------------------------------------------------------------------|----------------------------|
|                                      | SU perceptions: retention                                             | CP—SU interactions                       |         |                                                                                                                                                                                                                                                                                                                                                                                                                                                                                                                 | 331    | <i>If</i> service users can specify the type of contact (face-to-face, over the phone etc..) they would prefer, then they will be more likely to be engaged with collaborative care<br><br>( <i>How</i> individuals are actually engaged rather than through a particular communication method is most important. ) | key leader, 7              |
|                                      | SU Perceptions: Vocabulary                                            | SU retention                             |         |                                                                                                                                                                                                                                                                                                                                                                                                                                                                                                                 | 302    | <i>If</i> ongoing contact and engagement with service users is to be maintained <i>then</i> using the term ‘scheduled’ and ‘schedules’ (regarding follow up appointments) may not be appropriate for all service users. ONGOING                                                                                     | key leader, 7              |
| Endings                              | SU perceptions: Endings                                               | Practitioner—practitioner interactions   | 73      | If there is a hand over from old to new practitioner, and care partners are sensitive to loss issues from former practitioners after transfer, then anxieties are reduced in service users, and the experience could be transformed to a positive learning experience.                                                                                                                                                                                                                                          | 261    | [also in 4. And 6.]<br><br>If there is a hand over from old to new practitioner, then anxieties are reduced in anxious practitioners, carers and patients, as well as improving care.                                                                                                                               | key leader, 7              |
|                                      | SU perceptions: Transfer into Partners                                | CP—SU interactions                       |         |                                                                                                                                                                                                                                                                                                                                                                                                                                                                                                                 | 259    | If case managers are sensitive to loss issues from former practitioners after transfer, then these effects may be ameliorated (and the experience could be transformed to a positive learning experience – rb addition).                                                                                            | key leader, 7              |
| Stigmatising behaviour and locations | SU empowerment, agency, confidence and/or self-belief: disempowerment | Stigma: Disrespect                       | 74      | If health care practitioners or others evoke a stigmatised identity for service users, for example<br><br>by overshadowing, ignoring, disrespecting wishes of, and/or refusing to believe service users,<br><br>by refusing to allow them to make choices or take responsibility, and/or<br><br>by focusing on disability, symptoms and negative prognosis while ignoring strengths and other aspects of identity outside of ‘mentally ill’, such as social, ethnic, gender and sexual orientation differences, | S31    | If practitioners overshadow, ignore, disrespect wishes of, or refuse to believe service users, then this leaves service users feeling powerless, demotivated and dependent                                                                                                                                          | SU, 4                      |

| Macro/Meso/Micro level | Outcome ( <i>then</i> ) category                                                            | Context/Mechanism ( <i>if</i> ) category | CES No. | Consolidated Candidate Theory                                                                                                                                                                                                                                                                                                                                                                                                                                                                                                                                                                                                                                   | ES No. | ESs                                                                                                                                                                                   | stakeholder, source number |
|------------------------|---------------------------------------------------------------------------------------------|------------------------------------------|---------|-----------------------------------------------------------------------------------------------------------------------------------------------------------------------------------------------------------------------------------------------------------------------------------------------------------------------------------------------------------------------------------------------------------------------------------------------------------------------------------------------------------------------------------------------------------------------------------------------------------------------------------------------------------------|--------|---------------------------------------------------------------------------------------------------------------------------------------------------------------------------------------|----------------------------|
|                        |                                                                                             |                                          |         | <p><i>then</i> this can be corrosive to service users' positive identity, confidence and initiative, can limit choices,</p> <p>over time they are likely to internalise a negative identity of 'mentally ill person', and/or</p> <p>they will be disempowered.</p> <p>Also, their recovery will become a dual process of recovering not only from the illness, but also from the role and identity of a person with mental illness.</p> <p>If people go to the same place for mental health care that they go to receive their usual care, then this greatly reduces barriers based on self-stigma and stigma from others about seeking mental health care.</p> |        |                                                                                                                                                                                       |                            |
|                        | General improvement for SUs: wellbeing                                                      | Stigma                                   |         |                                                                                                                                                                                                                                                                                                                                                                                                                                                                                                                                                                                                                                                                 | S27    | <i>If</i> stigma and discrimination are reduced, <i>then</i> recovery is supported                                                                                                    | SU, 4                      |
|                        | SU identity, self-esteem, self-understandings (including meaning of symptoms) and/or stigma | SU—practitioner interactions             |         |                                                                                                                                                                                                                                                                                                                                                                                                                                                                                                                                                                                                                                                                 | S29    | If practitioners overshadow, ignore, disrespect wishes of, or refuse to believe service users, then this depletes a service users' positive identity                                  | SU, 4                      |
|                        | SU identity, self-esteem, self-understandings (including meaning of symptoms) and/or stigma | SU—practitioner interactions             |         |                                                                                                                                                                                                                                                                                                                                                                                                                                                                                                                                                                                                                                                                 | S30    | If practitioners do not allow service users to make choices or to take responsibility, then this depletes a service users' positive identity                                          | SU, 4                      |
|                        | SU identity, self-esteem, self-understandings (including meaning of symptoms) and/or stigma | SU—practitioner interactions             |         |                                                                                                                                                                                                                                                                                                                                                                                                                                                                                                                                                                                                                                                                 | S52    | If practitioners focus on disabilities and symptoms and negative messages about prognosis, then this is likely to lower individual self-esteem without serving a constructive purpose | SU, 4                      |

| Macro/Meso/Micro level | Outcome ( <i>then</i> ) category                                                            | Context/Mechanism ( <i>if</i> ) category                                                  | CES No. | Consolidated Candidate Theory | ES No. | ESs                                                                                                                                                                                                                                                             | stakeholder, source number |
|------------------------|---------------------------------------------------------------------------------------------|-------------------------------------------------------------------------------------------|---------|-------------------------------|--------|-----------------------------------------------------------------------------------------------------------------------------------------------------------------------------------------------------------------------------------------------------------------|----------------------------|
|                        | SU identity, self-esteem, self-understandings (including meaning of symptoms) and/or stigma | SU—practitioner interactions                                                              |         |                               | S53    | If practitioners focus on disabilities and symptoms, then this is likely to leave service users feeling inadequate and stigmatised                                                                                                                              | practitioners, 2           |
|                        | SU identity, self-esteem, self-understandings (including meaning of symptoms) and/or stigma | SU—practitioner interactions: stigma                                                      |         |                               | S11    | If practitioners evoke a stigmatised identity for service users, over time they are likely to internalise a negative identity of ‘mentally ill person’                                                                                                          | SU, 4                      |
|                        | SU identity, self-esteem, self-understandings (including meaning of symptoms) and/or stigma | SU—practitioner interactions: practitioners who refuse to adapt care for individual needs |         |                               | S22b   | If individual differences and histories as well as social, ethnic, gender and sexual orientation differences are ignored by practitioners in a ‘one size fits all’ approach, then such practice can be stigmatising as ‘mentally ill’ subsumes other identities | practitioners, 2           |
|                        | SU identity, self-esteem, self-understandings (including meaning of symptoms) and/or stigma | SU—others interactions: stigma                                                            |         |                               | S12    | If service users experience stigma alongside their mental illness, then their recovery becomes a dual process of recovering not only from the illness, but also from the role and identity of a person with mental illness                                      | SU, 4                      |
|                        | SU identity, self-esteem, self-understandings (including meaning of symptoms) and/or stigma | Continuity                                                                                |         |                               | 256    | If people can go to the same place where they receive their usual care, then this greatly reduces a lot of the barriers based on self-stigma and stigma from others to seeking mental health care.                                                              | key leader, 7              |
|                        | SU empowerment, agency, confidence and/or self-belief                                       | Marginalisation/stigma                                                                    |         |                               | S16    | If service users experience ‘social affliction’ during mental illness, then negative perceptions (imposed by others, and/or internalised) can be corrosive to confidence                                                                                        | SU, 4                      |
|                        | SU empowerment, agency, confidence and/or self-belief: disempowerment                       | Marginalisation/stigma                                                                    |         |                               | S14    | If service users experience ‘social affliction’ during mental illness, then negative perceptions (imposed by others, and/or internalised) can limit choices                                                                                                     | SU, 4                      |
|                        | SU empowerment, agency, confidence and/or self-belief: disempowerment                       | Marginalisation/stigma                                                                    |         |                               | S17    | If service users experience ‘social affliction’ during mental illness, then negative perceptions (imposed by others, and/or internalised) can be corrosive to initiative                                                                                        | SU, 4                      |

| Macro/Meso/Micro level | Outcome ( <i>then</i> ) category       | Context/Mechanism ( <i>if</i> ) category                              | CES No. | Consolidated Candidate Theory                                                                                                                                                                                                                                                                                                                                                                                                                                                                                                | ES No. | ESs                                                                                                                                                                                                                                                                                                                                                                                                          | stakeholder, source number            |
|------------------------|----------------------------------------|-----------------------------------------------------------------------|---------|------------------------------------------------------------------------------------------------------------------------------------------------------------------------------------------------------------------------------------------------------------------------------------------------------------------------------------------------------------------------------------------------------------------------------------------------------------------------------------------------------------------------------|--------|--------------------------------------------------------------------------------------------------------------------------------------------------------------------------------------------------------------------------------------------------------------------------------------------------------------------------------------------------------------------------------------------------------------|---------------------------------------|
| Strengths              | SU empowerment, hope                   | Strengths                                                             | 75      | <p><i>If</i> practitioners focus on resilience, strengths and performance, and communicate the potential for recovery, <i>then</i> service users' self-belief is strengthened, and this can provide internal answers and drivers to recovery, leaving people feeling hopeful, empowered and motivated.</p> <p>Whereas,</p> <p>If service users do not know about the potential to be well, then, although they may dislike being mentally ill, they may prefer the safety and security of mental illness to the unknown.</p> | S50    | <i>If</i> practitioners focus on resilience, strengths and performance, <i>then</i> service users' self-belief is strengthened                                                                                                                                                                                                                                                                               | practitioners, 2                      |
|                        | General improvement for SUs: wellbeing | Focus on attitude change towards personal recovery                    |         |                                                                                                                                                                                                                                                                                                                                                                                                                                                                                                                              | 204    | <u>If a central aim within PARTNERS is towards personal recovery, eg., helping the service user find his way in life beyond symptoms of severe mental illness,</u> then there needs to be a real focus on bringing about an attitude change towards this aim, because established expectations within mental health care, for practitioners and potentially service users, revolve around symptom reduction. | key leader, 7                         |
|                        | Hope                                   | SU lack of knowledge about the potential for recovery                 |         |                                                                                                                                                                                                                                                                                                                                                                                                                                                                                                                              | S66    | If service users do not know about the potential to be well, then, although they may dislike being mentally ill, they may prefer the safety and security of mental illness to the unknown.                                                                                                                                                                                                                   | SU, 4                                 |
|                        | SU hope, willingness to change         | Others—SU interactions: communicating potential for personal recovery |         |                                                                                                                                                                                                                                                                                                                                                                                                                                                                                                                              | S4     | <i>If</i> practitioners, family and peers communicate the potential for recovery, <i>then</i> service users are more likely to feel hopeful                                                                                                                                                                                                                                                                  | SU, 1<br>SU, 4<br>MH policy makers, 3 |
|                        | SU hope, willingness to change         | CP—SU interactions: focus on strengths                                |         |                                                                                                                                                                                                                                                                                                                                                                                                                                                                                                                              | S48    | <i>If</i> practitioners focus on resilience, strengths and performance, <i>then</i> service users feel hopeful                                                                                                                                                                                                                                                                                               | practitioners, 2                      |

| Macro/Meso/Micro level                                            | Outcome ( <i>then</i> ) category                      | Context/Mechanism ( <i>if</i> ) category                    | CES No. | Consolidated Candidate Theory                                                                                                                                                                                                                                                                                                                                                                                                                                                                                                                                 | ES No. | ESs                                                                                                                                                                                                                                                                                                                                                                                                        | stakeholder, source number |
|-------------------------------------------------------------------|-------------------------------------------------------|-------------------------------------------------------------|---------|---------------------------------------------------------------------------------------------------------------------------------------------------------------------------------------------------------------------------------------------------------------------------------------------------------------------------------------------------------------------------------------------------------------------------------------------------------------------------------------------------------------------------------------------------------------|--------|------------------------------------------------------------------------------------------------------------------------------------------------------------------------------------------------------------------------------------------------------------------------------------------------------------------------------------------------------------------------------------------------------------|----------------------------|
|                                                                   | SU empowerment, agency, confidence and/or self-belief | Strengths                                                   |         |                                                                                                                                                                                                                                                                                                                                                                                                                                                                                                                                                               | S49    | If practitioners focus on resilience, strengths and performance, then service users feel empowered and motivated                                                                                                                                                                                                                                                                                           | practitioners, 2           |
|                                                                   | SU empowerment, agency, confidence and/or self-belief | Respect/acceptance<br>Strengths<br>Shared understanding     |         |                                                                                                                                                                                                                                                                                                                                                                                                                                                                                                                                                               | 11     | <i>[Also SU Meaning]</i><br><br>If health care practitioners demonstrate non-judgmental, positive attitudes towards service users, focusing on their resilience, strengths and performance, and acknowledging their multiple identities, supporting service users' self-acceptance, self-confidence and self-belief, <i>then</i> such self-perceptions can act as internal answers and drivers to recovery | SU, 4                      |
| <b>Shared understanding: person-centred care</b>                  | SU empowerment, agency, confidence and/or self-belief | CP—SU interactions: Shared understanding                    | 76      | If the care partner uses coaching to support the person to clarify their goals, personal preferences and cultural/spiritual values, <i>then</i> the person will be actively engaged, more willing to follow treatment plans, and achieve some agency and empowerment despite ongoing symptoms.<br><br>If care partners offer a level of guidance in response to individual service user need, then the self-determination of service users may be initiated, preventing them from feeling lost and full of doubt as might happen if they had too much choice. | 272    | If the intervention does things that are important to service users <i>then</i> the service users will be motivated to be engaged and activated                                                                                                                                                                                                                                                            | key leader, 7              |
| <b>Person-centred care Self-management (same as information?)</b> | SU empowerment, agency, confidence and/or self-belief | CP—SU interactions: Shared understanding; coping strategies |         |                                                                                                                                                                                                                                                                                                                                                                                                                                                                                                                                                               | 285    | If the case manager uses coaching to support the person to make best use of the health care team, clarify their goals, preferences and values, develop self-management skills etc <i>then</i> the person will achieve some agency and empowerment                                                                                                                                                          | key leader, 7              |
| Person-centred care                                               | SU empowerment, agency, confidence and/or self-belief | CP—SU: Shared understanding                                 |         |                                                                                                                                                                                                                                                                                                                                                                                                                                                                                                                                                               | S44    | If practitioners make treatment decisions with service users in ways that suit their cultural, spiritual and personal ideals, then they are motivated to participate actively in their care.                                                                                                                                                                                                               | MH policy makers, 3        |

| Macro/Meso/Micro level | Outcome ( <i>then</i> ) category                                      | Context/Mechanism ( <i>if</i> ) category | CES No. | Consolidated Candidate Theory                                                                                                                                                                                                                                                                                                                                                                                                                                   | ES No. | ESs                                                                                                                                                                                                                                                                                                                                               | stakeholder, source number |
|------------------------|-----------------------------------------------------------------------|------------------------------------------|---------|-----------------------------------------------------------------------------------------------------------------------------------------------------------------------------------------------------------------------------------------------------------------------------------------------------------------------------------------------------------------------------------------------------------------------------------------------------------------|--------|---------------------------------------------------------------------------------------------------------------------------------------------------------------------------------------------------------------------------------------------------------------------------------------------------------------------------------------------------|----------------------------|
| Person-centred care    | SU empowerment, agency, confidence and/or self-belief                 | Shared understanding                     |         |                                                                                                                                                                                                                                                                                                                                                                                                                                                                 | 272    | <i>If</i> the intervention does things that are important to service users <i>then</i> the service users will be motivated to be engaged and activated                                                                                                                                                                                            | key leader, 7              |
| Person-centred         | SU empowerment, agency, confidence and/or self-belief: disempowerment | Shared Understanding                     |         |                                                                                                                                                                                                                                                                                                                                                                                                                                                                 | S34    | If some service users had too much choice, then they felt lost and full of doubt about making choices                                                                                                                                                                                                                                             | SU, 4                      |
| Person-centred         | SU empowerment, agency, confidence and/or self-belief                 | CP—SU: Shared understanding              |         |                                                                                                                                                                                                                                                                                                                                                                                                                                                                 | S33    | If practitioners are able to offer an appropriate level of guidance then the self-determination of service users may be initiated                                                                                                                                                                                                                 | SU, 4                      |
| Person-centred         | SU perceptions and experiences                                        | SU-CP interactions                       |         |                                                                                                                                                                                                                                                                                                                                                                                                                                                                 | 430a   | [also in 6 as 430b]<br><br>If practitioners take a collaborative approach to SUs, working ‘as a team’, involving SUs in decisions, giving choices and negotiating about disagreement, focussing on personally valued goals rather than professional goals then this is experienced as good care and leads to better adherence to treatment plans. | SU, 8                      |
| Person-centred         | SU empowerment, agency, confidence and/or self-belief                 | CP—SU interactions                       |         |                                                                                                                                                                                                                                                                                                                                                                                                                                                                 | 170    | If CPs interact with service users in ways that are relevant to the service users’ values and goals,<br>And If CPs teach service users strategies for interacting with their health care providers,<br>Then Service users will develop their self-management skills                                                                               | key leader, 7              |
| Managing risk          | SU empowerment, agency, confidence and/or self-belief<br><br>Identity | Managing risk: Shared understanding      | 77      | <i>If</i> practitioners move beyond preoccupations with risk avoidance, towards constructive and creative risk-taking related to what is personally meaningful to the services user and their family, and/or<br><br>Encourage service users to ‘fail without fear’,<br><br><i>Then</i> the service user will be supported to develop self-efficacy and positive identity, and opportunities that are taken up can establish the ability to cope with adversity, | S60a   | If practitioners move beyond preoccupations with risk avoidance, towards constructive and creative risk-taking related to what is personally meaningful to the services user and their family, then the service user will be supported to develop self-determination and self-efficacy                                                            | MH policy makers, 3        |

| Macro/Meso/Micro level | Outcome ( <i>then</i> ) category                                                            | Context/Mechanism ( <i>if</i> ) category    | CES No. | Consolidated Candidate Theory                                                                                                                                                                                                                                                                  | ES No. | ESs                                                                                                                                                                                                                                        | stakeholder, source number       |
|------------------------|---------------------------------------------------------------------------------------------|---------------------------------------------|---------|------------------------------------------------------------------------------------------------------------------------------------------------------------------------------------------------------------------------------------------------------------------------------------------------|--------|--------------------------------------------------------------------------------------------------------------------------------------------------------------------------------------------------------------------------------------------|----------------------------------|
|                        |                                                                                             |                                             |         | because the person is important enough to justify trying.<br><br>If practitioners do not allow service users to make choices or to take responsibility, then this lack of challenge, responsibility or control leaves service users feeling undervalued, powerless, demotivated and dependent. |        |                                                                                                                                                                                                                                            |                                  |
|                        | SU identity, self-esteem, self-understandings (including meaning of symptoms) and/or stigma | SU—practitioner interactions: managing risk |         |                                                                                                                                                                                                                                                                                                | S58    | If service users are encouraged to 'fail without fear', then opportunities that are taken up can establish self-esteem and identity, because the person is important enough to justify trying                                              | SU, 4                            |
|                        | SU identity, self-esteem, self-understandings (including meaning of symptoms) and/or stigma | Practitioner understandings                 |         |                                                                                                                                                                                                                                                                                                | S60b   | If practitioners move beyond preoccupations with risk avoidance, then the service user will be supported to develop self-esteem and positive identity                                                                                      | MH policymakers, 3               |
|                        | SU empowerment, agency, confidence and/or self-belief: disempowerment                       | Managing risk                               |         |                                                                                                                                                                                                                                                                                                | S32    | If practitioners do not allow service users to make choices or to take responsibility, then this leaves service users feeling powerless, demotivated and dependent                                                                         | SU, 4                            |
|                        | SU empowerment, agency, confidence and/or self-belief                                       | Managing risk                               |         |                                                                                                                                                                                                                                                                                                | S35    | If unnecessary constraints on service users' activities are removed, then they are more likely to regain self-determination                                                                                                                | SU, 4                            |
|                        | SU empowerment, agency, confidence and/or self-belief                                       | Managing risk                               |         |                                                                                                                                                                                                                                                                                                | S57    | If service users are encouraged to 'try and succeed', then opportunities that are taken up can establish the ability to cope with adversity                                                                                                | SU, 4                            |
|                        | SU empowerment, agency, confidence and/or self-belief: disempowerment                       | Managing risk                               |         |                                                                                                                                                                                                                                                                                                | S99    | If the element of risk or choice is removed from positions in order not to 'stress' service users too much, this lack of challenge, responsibility or control can demotivate service users, leaving them feeling undervalued and powerless | SU, 4                            |
|                        | Empowerment<br><br>Identity                                                                 | Information                                 | 78      | If practitioners gave service users information about symptoms, coping strategies and self-help literature,                                                                                                                                                                                    | S65    | If practitioners gave service users information about symptoms and coping strategies, <i>then</i> this knowledge could help them take note of triggers, events and                                                                         | MH policy makers, 3<br><br>SU, 4 |

| Macro/Meso/Micro level | Outcome ( <i>then</i> ) category                                                            | Context/Mechanism ( <i>if</i> ) category  | CES No. | Consolidated Candidate Theory                                                                                                                                                                                                                                                                                                                                                                                                                                                                                                                                                                                                                                                                                                                                        | ES No. | ESs                                                                                                                                                                                                                                                  | stakeholder, source number |
|------------------------|---------------------------------------------------------------------------------------------|-------------------------------------------|---------|----------------------------------------------------------------------------------------------------------------------------------------------------------------------------------------------------------------------------------------------------------------------------------------------------------------------------------------------------------------------------------------------------------------------------------------------------------------------------------------------------------------------------------------------------------------------------------------------------------------------------------------------------------------------------------------------------------------------------------------------------------------------|--------|------------------------------------------------------------------------------------------------------------------------------------------------------------------------------------------------------------------------------------------------------|----------------------------|
|                        |                                                                                             |                                           |         | <p><i>then</i> this knowledge could help them take note of triggers, events and symptoms involved with their own ill health, helping them to learn to take action to prevent the escalation of their symptoms,</p> <p>help them know what keeps them well, and/or</p> <p>service users will be able to normalise these symptoms/experiences, supporting self-acceptance and reducing self-stigma.</p> <p><i>If</i> CPs support service users to have changed expectations about consultations, and support the person to make best use of the health care team, <i>then</i> they will be more likely to behave as activated patients.</p> <p>But,</p> <p>If service users are not given information about their illness, then service users can be disempowered.</p> |        | symptoms involved with their own ill health, as well as what keeps them well                                                                                                                                                                         |                            |
|                        | General improvement for SUs: wellbeing                                                      | Knowledge about MH                        |         |                                                                                                                                                                                                                                                                                                                                                                                                                                                                                                                                                                                                                                                                                                                                                                      | S108   | <i>If</i> service users involved themselves in education about their condition, <i>then</i> this helped facilitate recovery                                                                                                                          | SU, 4                      |
|                        | General improvement for SUs: wellbeing                                                      | Coping strategies                         |         |                                                                                                                                                                                                                                                                                                                                                                                                                                                                                                                                                                                                                                                                                                                                                                      | 166    | If CPs support service users to develop their self-management skills, then their health is likely to improve with or without specialised psychotherapy                                                                                               | key leader, 7              |
|                        | General improvement for SUs: wellbeing                                                      | Coping strategies                         |         |                                                                                                                                                                                                                                                                                                                                                                                                                                                                                                                                                                                                                                                                                                                                                                      | 168    | If CPs work with the SU on self-management, then their health will improve to a greater extent than it would if the CP took only a psychoeducation (lecture) approach                                                                                | key leader, 7              |
|                        | SU identity, self-esteem, self-understandings (including meaning of symptoms) and/or stigma | SU—practitioner interactions: information |         |                                                                                                                                                                                                                                                                                                                                                                                                                                                                                                                                                                                                                                                                                                                                                                      | S25    | <i>If</i> practitioners give information to service users that helps them make meaning/sense of their experiences of SMI, <i>then</i> service users will be able to normalise these experiences, supporting self-acceptance and reducing self-stigma | SU, 1                      |

| Macro/Meso/Micro level | Outcome ( <i>then</i> ) category                      | Context/Mechanism ( <i>if</i> ) category                    | CES No. | Consolidated Candidate Theory | ES No. | ESs                                                                                                                                                                                                                                                             | stakeholder, source number   |
|------------------------|-------------------------------------------------------|-------------------------------------------------------------|---------|-------------------------------|--------|-----------------------------------------------------------------------------------------------------------------------------------------------------------------------------------------------------------------------------------------------------------------|------------------------------|
|                        | SU empowerment, agency, confidence and/or self-belief | Information                                                 |         |                               | S68    | <i>If</i> service users are provided with information about activities, <i>then</i> they are more likely to become involved in these activities                                                                                                                 | MH policy makers, 3<br>SU, 4 |
|                        | SU empowerment, agency, confidence and/or self-belief | Information                                                 |         |                               | S69    | If diagnosis was given with information about symptoms and coping strategies, then service users could find it empowering                                                                                                                                       | SU, 4                        |
|                        | SU empowerment, agency, confidence and/or self-belief | Information                                                 |         |                               | S133   | If service users learn to access self-help materials as needed, then this will support their self-management                                                                                                                                                    | SU, 1                        |
|                        | SU empowerment, agency, confidence and/or self-belief | Diagnosis/treatment                                         |         |                               | S70    | If diagnosis is suppressed by professionals or symptoms are not diagnosed and treated appropriately, then service users can be disempowered                                                                                                                     | SU, 4                        |
|                        | SU empowerment, agency, confidence and/or self-belief | Self-knowledge                                              |         |                               | S63    | If service users come to know their limitations, including what for them is a good work life balance, then this can guide planning and decisions about when it is useful to 'push things' and when it is better to take it easy                                 | SU, 4                        |
|                        | SU empowerment, agency, confidence and/or self-belief | Self-knowledge/coping strategies                            |         |                               | 169    | If CPs discuss triggers and warning signs for symptoms of SMI with service users, and use these as the basis for creating an action or coping plan for self-management, then service users can learn to take action to prevent the escalation of their symptoms | key leader, 7                |
|                        | SU empowerment, agency, confidence and/or self-belief | Coping strategies                                           |         |                               | S134   | <i>If</i> service users learn self-management, <i>then</i> they will be able to continue with everyday life despite ongoing symptoms                                                                                                                            | SU, 1                        |
| Information            | SU empowerment, agency, confidence and/or self-belief | CP—SU interaction                                           |         |                               | 269    | <i>If</i> service users are supported to have changed expectations about the consultation <i>then</i> they will be more likely to behave as activated patients                                                                                                  | key leader, 7                |
| Information            | SU empowerment, agency, confidence and/or self-belief | CP—SU interactions: Shared understanding; coping strategies |         |                               | 285    | <i>If</i> the case manager uses coaching to support the person to make best use of the health care team, clarify their goals, preferences and values, develop self-management skills etc <i>then</i> the person will achieve some agency and empowerment        | key leader, 7                |
| Information            | SU empowerment, agency, confidence and/or self-belief | CP—SU interactions                                          |         |                               | 170    | If CPs interact with service users in ways that are relevant to the service users' values and goals,                                                                                                                                                            | key leader, 7                |

| Macro/Meso/Micro level | Outcome ( <i>then</i> ) category                      | Context/Mechanism ( <i>if</i> ) category | CES No. | Consolidated Candidate Theory                                                                                                                                                                                                                                                                                                                                                                                                                                                                                                | ES No. | ESs                                                                                                                                                                  | stakeholder, source number |
|------------------------|-------------------------------------------------------|------------------------------------------|---------|------------------------------------------------------------------------------------------------------------------------------------------------------------------------------------------------------------------------------------------------------------------------------------------------------------------------------------------------------------------------------------------------------------------------------------------------------------------------------------------------------------------------------|--------|----------------------------------------------------------------------------------------------------------------------------------------------------------------------|----------------------------|
|                        |                                                       |                                          |         |                                                                                                                                                                                                                                                                                                                                                                                                                                                                                                                              |        | And If CPs teach service users strategies for interacting with their health care providers, Then Service users will develop their self-management skills             |                            |
|                        | SU empowerment, agency, confidence and/or self-belief | Knowledge/information                    |         |                                                                                                                                                                                                                                                                                                                                                                                                                                                                                                                              | 165    | If roles within collaborative care are explained to the SU, then they will be able to call on the appropriate person according to what they need help for            | key leader, 7              |
|                        | SU empowerment, meaning                               | Meaning (understanding): Faith           | 79      | <p><i>If</i> service users adopt a fundamental belief system,</p> <p><i>then</i> this can provide a reason to carry on through distress,</p> <p>provide meaning in their lives, and/or</p> <p>provide motivation to do well and prosper.</p> <p>However,</p> <p>If service users believed in something bigger than themselves, then this faith could impact them negatively if they understand mental illness as a punishment, or if this faith led them to surrender their inner authority and personal accountability.</p> | S116   | If service users believed in something bigger than themselves, then this faith could impact them negatively when they understand mental illness as a punishment      | SU, 4                      |
|                        | SU Meaning                                            | Meaning (understanding/faith)            |         |                                                                                                                                                                                                                                                                                                                                                                                                                                                                                                                              | S113a  | <i>If</i> service users believed in something bigger than themselves, <i>then</i> this faith could provide meaning to their lives                                    | SU, 4                      |
|                        | SU Meaning                                            | Meaning (understanding)                  |         |                                                                                                                                                                                                                                                                                                                                                                                                                                                                                                                              | S113b  | If service users adopt a fundamental belief system, then this can provide meaning to their lives                                                                     | SU, 4                      |
|                        | SU empowerment, agency, confidence and/or self-belief | Faith                                    |         |                                                                                                                                                                                                                                                                                                                                                                                                                                                                                                                              | S113c  | If service users adopt a fundamental belief system, then this can provide a reason to carry on through distress                                                      | SU, 4                      |
|                        | SU empowerment, agency, confidence and/or self-belief | Faith                                    |         |                                                                                                                                                                                                                                                                                                                                                                                                                                                                                                                              | S114   | <i>If</i> service users believed in something bigger than themselves, <i>then</i> this faith could provide motivation to do well and prosper                         | SU, 4                      |
|                        | SU empowerment, agency, confidence                    | Faith                                    |         |                                                                                                                                                                                                                                                                                                                                                                                                                                                                                                                              | S145   | <i>If</i> service users believed in something bigger than themselves, then this faith could lead them to surrender their inner authority and personal accountability | Carer, 5                   |

| Macro/Meso/Micro level | Outcome ( <i>then</i> ) category                      | Context/Mechanism ( <i>if</i> ) category | CES No. | Consolidated Candidate Theory                                                                                                                                                                                                                                                                                                                                                                                                                                                                                                                                                                                                                                                                                                                                                                                                                                                                                                                      | ES No. | ESs                                                                                                                                                                    | stakeholder, source number   |
|------------------------|-------------------------------------------------------|------------------------------------------|---------|----------------------------------------------------------------------------------------------------------------------------------------------------------------------------------------------------------------------------------------------------------------------------------------------------------------------------------------------------------------------------------------------------------------------------------------------------------------------------------------------------------------------------------------------------------------------------------------------------------------------------------------------------------------------------------------------------------------------------------------------------------------------------------------------------------------------------------------------------------------------------------------------------------------------------------------------------|--------|------------------------------------------------------------------------------------------------------------------------------------------------------------------------|------------------------------|
|                        | and/or self-belief: disempowerment                    |                                          |         |                                                                                                                                                                                                                                                                                                                                                                                                                                                                                                                                                                                                                                                                                                                                                                                                                                                                                                                                                    |        |                                                                                                                                                                        |                              |
|                        | SU empowerment, agency, confidence and/or self-belief | Hope                                     | 80      | <p><i>If</i> CPs support service users to understand mental illness as something it is possible to have alongside a meaningful life and/or help them to hope that things can be different,</p> <p><i>then</i> SUs are more likely to be psychologically and physically active and energetic and so engage in meaningful activities, persevere when things go wrong, and make real changes in their lives.</p> <p>However,</p> <p><i>If</i> service users feel hope without taking responsibility for their own lives, as a form of ‘wishful thinking’, for example by depending solely on medication or health care professionals for recovery, <i>then</i> it may involve a surrender of inner authority, and be disempowering</p> <p>Or,</p> <p><i>If</i> others communicate a lack of belief in the ability of a service user to be able to fulfil a task, then this can motivate the service user to ‘show them’ and work towards the task</p> | S6     | If practitioners, family and peers communicate the potential for recovery, then service users are more likely to persevere when things go wrong                        | SU, 1                        |
|                        | SU empowerment, agency, confidence and/or self-belief | Coordination of care                     |         |                                                                                                                                                                                                                                                                                                                                                                                                                                                                                                                                                                                                                                                                                                                                                                                                                                                                                                                                                    | S5     | If practitioners, family and peers communicate the potential for recovery, then service users are more likely to engage in constructive action                         | SU, 1<br>MH policy makers, 3 |
|                        | SU empowerment, agency, confidence and/or self-belief | Hope                                     |         |                                                                                                                                                                                                                                                                                                                                                                                                                                                                                                                                                                                                                                                                                                                                                                                                                                                                                                                                                    | S9     | <i>If</i> service users reframe mental illness as something it is possible to have alongside a meaningful life, then they are more likely to be active psychologically | SU, 4                        |
|                        | SU empowerment, agency, confidence and/or self-belief | Hope                                     |         |                                                                                                                                                                                                                                                                                                                                                                                                                                                                                                                                                                                                                                                                                                                                                                                                                                                                                                                                                    | 280    | <i>If</i> the intervention can support people to have hope <i>then</i> they can make a real change in their lives                                                      | key leader, 7                |

| Macro/Meso/Micro level        | Outcome ( <i>then</i> ) category                                      | Context/Mechanism ( <i>if</i> ) category | CES No. | Consolidated Candidate Theory                                                                                                                                                                                                                                                                                                                                                                                                                                                                                                                                                                                                                                                                  | ES No. | ESs                                                                                                                                                                                                                  | stakeholder, source number |
|-------------------------------|-----------------------------------------------------------------------|------------------------------------------|---------|------------------------------------------------------------------------------------------------------------------------------------------------------------------------------------------------------------------------------------------------------------------------------------------------------------------------------------------------------------------------------------------------------------------------------------------------------------------------------------------------------------------------------------------------------------------------------------------------------------------------------------------------------------------------------------------------|--------|----------------------------------------------------------------------------------------------------------------------------------------------------------------------------------------------------------------------|----------------------------|
|                               | SU empowerment, agency, confidence and/or self-belief                 | Hope (?)<br>Meaning (?)                  |         |                                                                                                                                                                                                                                                                                                                                                                                                                                                                                                                                                                                                                                                                                                | S10    | <i>If</i> service users reframe mental illness as something it is possible to have alongside a meaningful life, <i>then</i> they are more likely to be active and energetic and so engage in meaningful activities   | SU, 4                      |
|                               | SU empowerment, agency, confidence and/or self-belief: disempowerment | SU perceptions: unrealistic hope         |         |                                                                                                                                                                                                                                                                                                                                                                                                                                                                                                                                                                                                                                                                                                | S146   | <i>If</i> service users feel hope without taking responsibility for their own lives, as a form of ‘wishful thinking’, <i>then</i> it may involve a surrender of inner authority, and be disempowering                | SU, 5                      |
|                               | SU empowerment, agency, confidence and/or self-belief: disempowerment | Hope: medication                         |         |                                                                                                                                                                                                                                                                                                                                                                                                                                                                                                                                                                                                                                                                                                | S147   | <i>If</i> service users invest their hope in pharmaceuticals and the decisions of those dispensing them, <i>then</i> they may abdicate responsibility for their own recovery                                         | SU, 5                      |
|                               | SU empowerment, agency, confidence and/or self-belief: disempowerment | CP—SU interaction: low expectations      |         |                                                                                                                                                                                                                                                                                                                                                                                                                                                                                                                                                                                                                                                                                                | S7     | [contradictory statement?]<br>If others communicate a lack of belief in the ability of a service user to be able to fulfil a task, then this can motivate the service user to ‘show them’ and work towards the task  | SU, 4                      |
|                               | SU empowerment, agency, confidence and/or self-belief: disempowerment | SU Empowerment: disempowerment           |         |                                                                                                                                                                                                                                                                                                                                                                                                                                                                                                                                                                                                                                                                                                | S45    | If service users feel powerless or disenfranchised, then these feelings can interfere with initiation and maintenance of mental health and medical care.                                                             | MH policy makers, 3        |
| ! needs more thinking through | SU empowerment, identity, meaning                                     | SU input                                 | 81      | <p>If recovery results from the development of a service user’s inner strength and self-acceptance, then recovery is not completely within the scope of the mental health system, but must always depend on involvement by the service user, where service users must be willing, ready, able, and allowed to action change before recovery can happen.</p> <p>If service users are willing, ready, able and allowed to action change, then such self-involvement and determination can result in re-finding and redefining identity, as well as establishing self-efficacy.</p> <p>However,</p> <p>If the service user does not feel able to act positively within the problem situation,</p> | S46    | If recovery results from the development of a service user’s inner strength, then recovery is not completely within the scope of the mental health system, but must always depend on involvement by the service user | SU, 4                      |

| Macro/Meso/Micro level | Outcome ( <i>then</i> ) category                                      | Context/Mechanism ( <i>if</i> ) category | CES No. | Consolidated Candidate Theory                                                                                                                                                                                                                                                                             | ES No. | ESs                                                                                                                                                                                                                                                                                                                | stakeholder, source number |
|------------------------|-----------------------------------------------------------------------|------------------------------------------|---------|-----------------------------------------------------------------------------------------------------------------------------------------------------------------------------------------------------------------------------------------------------------------------------------------------------------|--------|--------------------------------------------------------------------------------------------------------------------------------------------------------------------------------------------------------------------------------------------------------------------------------------------------------------------|----------------------------|
|                        |                                                                       |                                          |         | does not feel ready for change and/or is unwilling to assume responsibility for his or her choices and action, then they may remain stuck, unable to benefit from coaching.                                                                                                                               |        |                                                                                                                                                                                                                                                                                                                    |                            |
|                        | SU Meaning                                                            | Identity                                 |         |                                                                                                                                                                                                                                                                                                           | S20a   | <i>If</i> service users accept themselves with symptoms of mental illness and develop self-confidence and self-belief, <i>then</i> these can act as internal answers and drivers to recovery                                                                                                                       | SU, 4                      |
|                        | SU Meaning                                                            | Empowerment                              |         |                                                                                                                                                                                                                                                                                                           | S20b   | <i>If</i> service users develop self-determination, <i>then</i> this acts as an internal answer and driver to recovery                                                                                                                                                                                             | SU, 4                      |
|                        | SU identity                                                           | SU input<br>SU—CP interactions           |         |                                                                                                                                                                                                                                                                                                           | S13a   | If recovery involves re-finding and redefining identity, then service users must be willing, ready, able, and allowed to action change<br><br>If service users are willing, ready, able, and allowed to action change, then they must be supported by giving them the space to re-find and redefine their identity | SU, 4                      |
|                        | SU empowerment, agency, confidence and/or self-belief                 | SU input                                 |         |                                                                                                                                                                                                                                                                                                           | S54    | If service users are required to muster internal reserves to continue to function in the role they occupy, then the determination mustered can establish self-efficacy                                                                                                                                             | SU, 4                      |
|                        | SU empowerment, agency, confidence and/or self-belief: disempowerment | Hopelessness                             |         |                                                                                                                                                                                                                                                                                                           | S40    | If the service user does not feel able to act positively within the problem situation, does not feel ready for change and/or is unwilling to assume responsibility for his or her choices and action, then they may remain stuck, unable to benefit from coaching                                                  | practitioners, 2           |
| <b>SU input</b>        | SU empowerment, agency, confidence and/or self-belief                 | SU identity                              |         |                                                                                                                                                                                                                                                                                                           | S13a   | If recovery involves re-finding and redefining identity, then service users must be willing, ready, able, and allowed to action change                                                                                                                                                                             | SU, 4                      |
|                        | Empowerment<br>Identity<br>Meaning                                    | Social roles and connectedness           | 82      | <i>If</i> service users become or are involved in relevant social roles and activities, and/or develop a focus outside their mental illness, such as artistic expression/creativity, <i>then</i> this provides a space for contemplation, self-expression and/or self-development away from mental health | S91a   | [Also in SU identity...]<br><br>If service users have meaningful social roles, then they are particularly likely to build confidence and self-esteem                                                                                                                                                               | SU, 1<br><br>SU, 4         |

| Macro/Meso/Micro level | Outcome ( <i>then</i> ) category       | Context/Mechanism ( <i>if</i> ) category | CES No. | Consolidated Candidate Theory                                                                                                                                                                                                                                                                                                                                                                                                                                                                                                                                                                                                                                                                                                                   | ES No. | ESs                                                                                                                                                                                             | stakeholder, source number |
|------------------------|----------------------------------------|------------------------------------------|---------|-------------------------------------------------------------------------------------------------------------------------------------------------------------------------------------------------------------------------------------------------------------------------------------------------------------------------------------------------------------------------------------------------------------------------------------------------------------------------------------------------------------------------------------------------------------------------------------------------------------------------------------------------------------------------------------------------------------------------------------------------|--------|-------------------------------------------------------------------------------------------------------------------------------------------------------------------------------------------------|----------------------------|
|                        |                                        |                                          |         | <p>issues, and/or can provide meaning and purpose to their lives.</p> <p>If SUs are required to muster internal reserves to continue to function in the role they occupy, or to respond creatively in order to meet challenges, then they are likely to build confidence, self-efficacy and self-esteem and be motivated to future constructive action.</p> <p>If the role/activity leads a service user to recover a sense of being a whole person for whom mental health problems are just one aspect of their life, then this may support them to accept themselves alongside their symptoms of mental illness.</p> <p>But,</p> <p><i>If</i> service users live rurally, <i>then</i> this can act as a barrier to community involvement.</p> |        |                                                                                                                                                                                                 |                            |
|                        | General improvement for SUs: wellbeing | Community activity                       |         |                                                                                                                                                                                                                                                                                                                                                                                                                                                                                                                                                                                                                                                                                                                                                 | S28    | <i>If</i> employment prospects; education and training opportunities; access to leisure, culture and recreation is increased, <i>then</i> recovery is supported                                 | SU, 4                      |
|                        | General improvement for SUs: wellbeing | Income<br>Community activity             |         |                                                                                                                                                                                                                                                                                                                                                                                                                                                                                                                                                                                                                                                                                                                                                 | S101   | <i>If</i> service users gain access to mainstream services that support ordinary living such as housing, adequate personal finances, education and leisure facilities, <i>then</i> they recover | MH policy makers, 3        |
|                        | General improvement for SUs: wellbeing | Self-expression                          |         |                                                                                                                                                                                                                                                                                                                                                                                                                                                                                                                                                                                                                                                                                                                                                 | S109   | <i>If</i> service users involved themselves in self-expression, <i>then</i> this helped facilitate recovery                                                                                     | SU, 4                      |
|                        | SU Meaning                             | Artistic expression/creativity           |         |                                                                                                                                                                                                                                                                                                                                                                                                                                                                                                                                                                                                                                                                                                                                                 | S123   | <i>If</i> service users engage in artistic or creative expression <i>then</i> this can create an ambiance of health because service users are involved in creating something of value           | SU, 4                      |

| Macro/Meso/Micro level | Outcome ( <i>then</i> ) category                                                            | Context/Mechanism ( <i>if</i> ) category | CES No. | Consolidated Candidate Theory | ES No. | ESs                                                                                                                                                                 | stakeholder, source number |
|------------------------|---------------------------------------------------------------------------------------------|------------------------------------------|---------|-------------------------------|--------|---------------------------------------------------------------------------------------------------------------------------------------------------------------------|----------------------------|
|                        | SU connectedness                                                                            | Location: rural                          |         |                               | S85    | <i>If</i> service users live rurally, <i>then</i> this can act as a barrier to involvement with peer support and other community involvement                        | SU, 4                      |
|                        | SU Meaning                                                                                  | Meaningful activity                      |         |                               | S103d  | <i>If</i> a service user becomes involved in community activities, <i>then</i> it may provide structure for the day                                                 | SU, 4                      |
|                        | SU Meaning                                                                                  | Meaningful activity                      |         |                               | S103e  | <i>If</i> a service user becomes involved in community activities, <i>then</i> it may give a sense of achievement                                                   | SU, 4                      |
|                        | SU Meaning                                                                                  | Artistic expression/creativity           |         |                               | S121   | <i>If</i> service users express their creativity, <i>then</i> this may be a means to provide an improved sense of purpose or meaning                                | SU, 4                      |
|                        | SU Meaning                                                                                  | Connectedness                            |         |                               | S73    | <i>If</i> service users engage in social activity or feel more connected to place, <i>then</i> they are more likely to find meaning and purpose in life             | SU, 4<br>researcher, 6     |
|                        | SU identity, self-esteem, self-understandings (including meaning of symptoms) and/or stigma | Meaningful focus/activity                |         |                               | S110   | If service users have a focus outside their mental illness, then this can provide a new positive identity                                                           | SU, 4                      |
|                        | SU identity, self-esteem, self-understandings (including meaning of symptoms) and/or stigma | Artistic expression/creativity           |         |                               | S118   | If service users express their creativity, then this may be a means to establish a new identity                                                                     | SU, 4                      |
|                        | SU identity, self-esteem, self-understandings (including meaning of symptoms) and/or stigma | Artistic expression/creativity           |         |                               | S117   | If service users express their creativity, then this may be a means to demonstrate their identity                                                                   | SU, 4                      |
|                        | SU identity, self-esteem, self-understandings (including meaning of symptoms) and/or stigma | Artistic expression/creativity           |         |                               | S122   | If service users engage in artistic or creative expression then they can express themselves without feeling exposed, allowing expression of those parts of the self | SU, 4                      |

| Macro/Meso/Micro level | Outcome ( <i>then</i> ) category                                                            | Context/Mechanism ( <i>if</i> ) category | CES No. | Consolidated Candidate Theory | ES No. | ESs                                                                                                                                                                 | stakeholder, source number            |
|------------------------|---------------------------------------------------------------------------------------------|------------------------------------------|---------|-------------------------------|--------|---------------------------------------------------------------------------------------------------------------------------------------------------------------------|---------------------------------------|
|                        |                                                                                             |                                          |         |                               |        | which may be difficult to express in any other way.                                                                                                                 |                                       |
|                        | SU identity, self-esteem, self-understandings (including meaning of symptoms) and/or stigma | Connectedness                            |         |                               | S72    | If service users engage in social activity, then their self-esteem is likely to increase                                                                            | SU, 4                                 |
|                        | SU identity, self-esteem, self-understandings (including meaning of symptoms) and/or stigma | Artistic expression/creativity           |         |                               | S56    | If service users respond creatively in order to meet challenges, then they can develop self-esteem                                                                  | SU, 4                                 |
|                        | SU identity, self-esteem, self-understandings (including meaning of symptoms) and/or stigma | SU—practitioner interactions             |         |                               | S55    | If service users are required to muster internal reserves to continue to function in the role they occupy, then the determination mustered can develop self-esteem  | SU, 4                                 |
|                        | SU empowerment, agency, confidence and/or self-belief                                       | Social roles                             |         |                               | S93a   | <i>[Also in SU identity]</i><br><br>If service users become involved in meaningful social roles, <i>then</i> they are likely to build confidence and self-esteem    | SU, 4                                 |
|                        | SU empowerment, agency, confidence and/or self-belief                                       | Social roles                             |         |                               | S93b   | If service users build confidence and self-esteem in response to meaningful social roles, <i>then</i> they are likely to be motivated to future constructive action | SU, 1<br>SU, 4<br>MH policy makers, 3 |
|                        | SU empowerment, agency, confidence and/or self-belief<br><br>Identity                       | Focus of interest                        |         |                               | S106   | If service users have a focus outside their mental illness <i>then</i> this provides a space for contemplation away from mental health issues                       | SU, 4                                 |
|                        | SU empowerment, agency, confidence and/or self-belief                                       | Focus of interest                        |         |                               | S107   | If service users have a focus outside their mental illness <i>then</i> this provides a means for                                                                    | SU, 4                                 |

| Macro/Meso/Micro level        | Outcome ( <i>then</i> ) category                                                            | Context/Mechanism ( <i>if</i> ) category | CES No. | Consolidated Candidate Theory                                                                                                                                                                                                                                                                                         | ES No. | ESs                                                                                                                                                                                                                      | stakeholder, source number |
|-------------------------------|---------------------------------------------------------------------------------------------|------------------------------------------|---------|-----------------------------------------------------------------------------------------------------------------------------------------------------------------------------------------------------------------------------------------------------------------------------------------------------------------------|--------|--------------------------------------------------------------------------------------------------------------------------------------------------------------------------------------------------------------------------|----------------------------|
|                               |                                                                                             |                                          |         |                                                                                                                                                                                                                                                                                                                       |        | self-development away from mental health issues                                                                                                                                                                          |                            |
|                               | SU empowerment, agency, confidence and/or self-belief                                       | Artistic expression/creativity           |         |                                                                                                                                                                                                                                                                                                                       | S125   | <i>If</i> service users engage in artistic or creative expression <i>then</i> the activity can offer an escape from negative thoughts                                                                                    | SU, 4                      |
|                               | SU empowerment, agency, confidence and/or self-belief                                       | Artistic expression/creativity           |         |                                                                                                                                                                                                                                                                                                                       | S119   | <i>If</i> service users express their creativity, <i>then</i> this may be a means to learn a different skill                                                                                                             | SU, 4                      |
|                               | SU empowerment, agency, confidence and/or self-belief                                       | Community activities                     |         |                                                                                                                                                                                                                                                                                                                       | S103c  | If a service user becomes involved in community activities, then they may learn new skills                                                                                                                               | SU, 4                      |
|                               | SU empowerment, agency, confidence and/or self-belief                                       | Community activities                     |         |                                                                                                                                                                                                                                                                                                                       | S103f  | <i>If</i> a service user becomes involved in community activities, <i>then</i> it may provide individuals with an external focus outside of their own recovery journey                                                   | SU, 4                      |
|                               | SU identity, self-esteem, self-understandings (including meaning of symptoms) and/or stigma | Meaning (understanding)                  |         |                                                                                                                                                                                                                                                                                                                       | S24    | If a service user recovers a sense of being a whole person for whom mental health problems are just one aspect of their life, then this may support them to accept themselves alongside their symptoms of mental illness | SU, 4                      |
| Return to employment/activity | SU empowerment, agency, confidence and/or self-belief                                       | Employment                               | 83      | <i>If</i> service users are allowed to return to a suitable and meaningful position at their own pace, including employment, voluntary work, creative and other community activities and/or education, <i>then</i> this supports a safe return to activity, allowing them to be less involved in times of ill health. | S64    | If service users engage in work allowing a self-determined level of responsibility, then this would allow them to be less involved in times of ill health                                                                | SU, 4                      |
|                               | SU empowerment, agency, confidence and/or self-belief                                       | Employment                               |         |                                                                                                                                                                                                                                                                                                                       | S95    | <i>If</i> service users found work stressful <i>then</i> not having to work could support their recovery                                                                                                                 | SU, 4                      |
|                               | SU empowerment, agency, confidence and/or self-belief                                       | Employment                               |         |                                                                                                                                                                                                                                                                                                                       | S100   | <i>If</i> service users are allowed to return to a suitable and meaningful position at their own pace, <i>then</i> this supports a safe return to work                                                                   | SU, 4                      |

| Macro/Meso/Micro level | Outcome ( <i>then</i> ) category                                      | Context/Mechanism ( <i>if</i> ) category | CES No. | Consolidated Candidate Theory                                                                                                                                                                                                                                                                                                                                                                                                                                       | ES No. | ESs                                                                                                                                                                                                                 | stakeholder, source number |
|------------------------|-----------------------------------------------------------------------|------------------------------------------|---------|---------------------------------------------------------------------------------------------------------------------------------------------------------------------------------------------------------------------------------------------------------------------------------------------------------------------------------------------------------------------------------------------------------------------------------------------------------------------|--------|---------------------------------------------------------------------------------------------------------------------------------------------------------------------------------------------------------------------|----------------------------|
|                        | SU empowerment, agency, confidence and/or self-belief: disempowerment | Employment                               |         |                                                                                                                                                                                                                                                                                                                                                                                                                                                                     | S98    | If service users return to work through supported employment, <i>then</i> they may feel patronised by excessive nannying                                                                                            | SU, 4                      |
|                        | SU empowerment, agency, confidence and/or self-belief: disempowerment | Employment                               |         |                                                                                                                                                                                                                                                                                                                                                                                                                                                                     | S98    | If service users return to work through supported employment, <i>then</i> they may feel patronised by excessive nannying                                                                                            | SU, 4                      |
|                        | SU empowerment, agency, confidence and/or self-belief: disempowerment | Employment                               |         |                                                                                                                                                                                                                                                                                                                                                                                                                                                                     | S96    | If service users' drive to work and provide for oneself was overshadowed by a fear that illness would return and jeopardise employment, this fear of failing in work acted as a major barrier to seeking employment | SU, 4                      |
|                        | SU empowerment, agency, confidence and/or self-belief: disempowerment | Employment                               |         |                                                                                                                                                                                                                                                                                                                                                                                                                                                                     | S97    | If service users return directly to previous employment without a paced return or transition period, <i>then</i> this may result in excessive stress and potential relapse                                          | SU, 4                      |
|                        | SU empowerment, identity                                              | Income                                   | 84      | If a service user receives a steady income from work,<br><br><i>then</i> this may provide a means to gain social status, improve standard of living and increase quality of life, to pursue other activities, to provide a restoration of normality, and/or to provide a sense of pleasure, pride and self-respect.<br><br>If service users do not have adequate income, <i>then</i> they may not be able to afford to maintain a balanced diet and fresh clothing. | S132   | If service users do not have adequate income, <i>then</i> they may not be able to afford to maintain a balanced diet and fresh clothing                                                                             | SU, 4                      |
|                        | General improvement for SUs: wellbeing                                | Income<br>Community activity             |         |                                                                                                                                                                                                                                                                                                                                                                                                                                                                     | S101   | If service users gain access to mainstream services that support ordinary living such as housing, adequate personal finances,                                                                                       | MH policy makers, 3        |

| Macro/Meso/Micro level                           | Outcome ( <i>then</i> ) category                                                            | Context/Mechanism ( <i>if</i> ) category | CES No. | Consolidated Candidate Theory                                                                                                                                                                                                                                                                                                                                                                           | ES No. | ESs                                                                                                                                | stakeholder, source number |
|--------------------------------------------------|---------------------------------------------------------------------------------------------|------------------------------------------|---------|---------------------------------------------------------------------------------------------------------------------------------------------------------------------------------------------------------------------------------------------------------------------------------------------------------------------------------------------------------------------------------------------------------|--------|------------------------------------------------------------------------------------------------------------------------------------|----------------------------|
|                                                  |                                                                                             |                                          |         |                                                                                                                                                                                                                                                                                                                                                                                                         |        | education and leisure facilities, <i>then</i> they recover                                                                         |                            |
|                                                  | General improvement for SUs: wellbeing                                                      | Income                                   |         |                                                                                                                                                                                                                                                                                                                                                                                                         | 104a   | If a service user receives a steady income from work, <i>then</i> this may provide a better standard of living and quality of life | SU, 4                      |
|                                                  | SU empowerment, agency, confidence and/or self-belief                                       | Income                                   |         |                                                                                                                                                                                                                                                                                                                                                                                                         | S104d  | If a service user receives a steady income from work, then this may provide a means to gain social status                          | SU, 4                      |
|                                                  | SU empowerment, agency, confidence and/or self-belief                                       | Income                                   |         |                                                                                                                                                                                                                                                                                                                                                                                                         | S104b  | If a service user receives a steady income from work, then this may provide financial means to pursue other activities             | SU, 4                      |
|                                                  | SU identity, self-esteem, self-understandings (including meaning of symptoms) and/or stigma | Income                                   |         |                                                                                                                                                                                                                                                                                                                                                                                                         | S104c  | If a service user receives a steady income from work, then this may provide the restoration of normality                           | SU, 4                      |
|                                                  | SU identity, self-esteem, self-understandings (including meaning of symptoms) and/or stigma | Income                                   |         |                                                                                                                                                                                                                                                                                                                                                                                                         | S104e  | If a service user receives a steady income from work, then this may provide a sense of pleasure, pride and self-respect            | SU, 4                      |
| [Added in CP referral to make it relevant to P2] | SU empowerment, identity                                                                    | SU—SU interactions                       | 85      | If CPs offer referrals, planning and support to a service user about peer groups, <i>then</i> through talking to others who have their own experience of mental health problems, peers can provide a role model to facilitate self-belief, self-worth and/or hope, support understanding and insight about difficulties with mental health, and/or support SUs to achieve motivational change. However, | S78    | If service users become involved in peer support groups, then they will become more confident                                      | SU, 4                      |

| Macro/Meso/Micro level | Outcome ( <i>then</i> ) category                                                            | Context/Mechanism ( <i>if</i> ) category | CES No. | Consolidated Candidate Theory                                                                                                                                          | ES No. | ESs                                                                                                                                                                                 | stakeholder, source number |
|------------------------|---------------------------------------------------------------------------------------------|------------------------------------------|---------|------------------------------------------------------------------------------------------------------------------------------------------------------------------------|--------|-------------------------------------------------------------------------------------------------------------------------------------------------------------------------------------|----------------------------|
|                        |                                                                                             |                                          |         | <i>If</i> service users live rurally, <i>then</i> this can act as a barrier to involvement with peer support.                                                          |        |                                                                                                                                                                                     |                            |
|                        | SU Meaning                                                                                  | Connectedness                            |         |                                                                                                                                                                        | S81    | <i>If</i> help is provided to service users by peers who have their own experience of mental health problems, <i>then</i> it is more meaningful [RGJ interpretation of 113 and 145] | SU, 4                      |
|                        | SU hope, willingness to change                                                              | SU—SU interactions                       |         |                                                                                                                                                                        | S82a   | <i>If</i> help is provided to service users by peers who have their own experience of mental health problems, <i>then</i> peers can provide a role model to facilitate hope         | SU, 4                      |
|                        | SU knowledge and insights about MH                                                          | SU—SU interactions                       |         |                                                                                                                                                                        | S77    | If service users become involved in peer support groups, then they will be supported by the common understanding and unique insight offered by peers                                | SU, 4                      |
|                        | SU self-knowledge                                                                           | SU—SU interactions                       |         |                                                                                                                                                                        | S76    | <i>If</i> service users become involved in peer support groups, <i>then</i> it gives them the opportunity to become more informed about themselves and their conditions             | SU, 4                      |
|                        | SU connectedness                                                                            | Location: rural                          |         |                                                                                                                                                                        | S85    | <i>If</i> service users live rurally, <i>then</i> this can act as a barrier to involvement with peer support and other community involvement                                        | SU, 4                      |
|                        | SU empowerment, agency, confidence and/or self-belief                                       | SU—SU interactions                       |         |                                                                                                                                                                        | 345    | <i>If</i> service users interact with their peers then this can support them to achieve motivational change                                                                         | key leader, 7              |
|                        | SU identity, self-esteem, self-understandings (including meaning of symptoms) and/or stigma | CP—SU interactions: referral             |         |                                                                                                                                                                        | S82b   | If help is provided to service users by peers who have their own experience of mental health problems, then peers can provide a role model to facilitate self-belief and self-worth | SU, 4                      |
| ??                     | SU identity, self-esteem, self-understandings (including meaning of symptoms) and/or stigma | Meaning (understanding)                  | 86      | If service users communicate the potential for positive aspects of mental illness, then this can alter the self-conceptions and societal conceptions of mental illness | S51    | If service users communicate the potential for positive aspects of mental illness, then this can alter the self-conceptions and societal conceptions of mental illness              | SU, 4                      |

| Macro/Meso/Micro level | Outcome ( <i>then</i> ) category                                                            | Context/Mechanism ( <i>if</i> ) category | CES No. | Consolidated Candidate Theory                                                                                                                                                                                                                                                                                                     | ES No. | ESs                                                                                                                                                                            | stakeholder, source number |
|------------------------|---------------------------------------------------------------------------------------------|------------------------------------------|---------|-----------------------------------------------------------------------------------------------------------------------------------------------------------------------------------------------------------------------------------------------------------------------------------------------------------------------------------|--------|--------------------------------------------------------------------------------------------------------------------------------------------------------------------------------|----------------------------|
|                        | SU empowerment, identity                                                                    | Physical health                          | 87      | If service users gain weight as a side effect to drug treatment, then service users could feel more vulnerable and less self-assured in their appearance and overall demeanour.<br><br>But,<br><br>If a service user follows an exercise regime and/or a healthy diet, then their wellbeing and self-esteem is likely to improve. | S129   | If service users gain weight as a side effect to drug treatment, then service users could feel more vulnerable and less self-assured in their appearance and overall demeanour | SU, 4                      |
|                        | General improvement for SUs: wellbeing                                                      | Physical health                          |         |                                                                                                                                                                                                                                                                                                                                   | S126b  | <i>If a service user follows a healthy diet, then their wellbeing is likely to improve</i>                                                                                     | SU, 4                      |
|                        | General improvement for SUs: wellbeing                                                      | Physical health                          |         |                                                                                                                                                                                                                                                                                                                                   | S127b  | <i>If a service user follows an exercise regime, then their wellbeing is likely to improve</i>                                                                                 | SU, 4                      |
|                        | SU identity, self-esteem, self-understandings (including meaning of symptoms) and/or stigma | Meaningful activity                      |         |                                                                                                                                                                                                                                                                                                                                   | S127a  | If a service user follows an exercise regime, then their wellbeing and self-esteem is likely to improve                                                                        | SU, 4                      |
|                        | SU identity, self-esteem, self-understandings (including meaning of symptoms) and/or stigma | Physical health                          |         |                                                                                                                                                                                                                                                                                                                                   | S126a  | If a service user follows a healthy diet, then their wellbeing and self-esteem is likely to improve                                                                            | SU, 4                      |
|                        | SU Meaning                                                                                  | Connectedness                            | 88      | <i>If service users feel more connected to place, then they are more likely to find meaning and purpose in life</i>                                                                                                                                                                                                               | S73    | <i>If service users engage in social activity or feel more connected to place, then they are more likely to find meaning and purpose in life</i>                               | SU, 4<br>researcher, 6     |
|                        | SU Meaning                                                                                  | <b>Giving back</b>                       | 89      | <i>If service users become involved in peer support groups, creative expression, or work as a volunteer, then it gives them the opportunity to 'give back'</i>                                                                                                                                                                    | S75    | <i>If service users become involved in peer support groups, then it gives them the opportunity to 'give back' as they help others in similar experiences</i>                   | SU, 4                      |
|                        | SU Meaning                                                                                  | Meaningful activity                      |         |                                                                                                                                                                                                                                                                                                                                   | 102    | <i>If a service user becomes a volunteer, then it may fill the desire to give back to others</i>                                                                               | SU, 4                      |
|                        | SU Meaning                                                                                  | Artistic expression/creativity           |         |                                                                                                                                                                                                                                                                                                                                   | S124   | If service users engage in artistic or creative expression then they can create things they can give to other people                                                           | SU, 4                      |

| Macro/Meso/Micro level                                                        | Outcome ( <i>then</i> ) category    | Context/Mechanism ( <i>if</i> ) category | CES No. | Consolidated Candidate Theory                                                                                                                                                                                                                                                                                                                                                                                                                                                                          | ES No. | ESs                                                                                                                                                                                                                                                                                              | stakeholder, source number |
|-------------------------------------------------------------------------------|-------------------------------------|------------------------------------------|---------|--------------------------------------------------------------------------------------------------------------------------------------------------------------------------------------------------------------------------------------------------------------------------------------------------------------------------------------------------------------------------------------------------------------------------------------------------------------------------------------------------------|--------|--------------------------------------------------------------------------------------------------------------------------------------------------------------------------------------------------------------------------------------------------------------------------------------------------|----------------------------|
| 8. Intervention content, trial practicalities and fidelity/process evaluation |                                     |                                          |         |                                                                                                                                                                                                                                                                                                                                                                                                                                                                                                        |        |                                                                                                                                                                                                                                                                                                  |                            |
|                                                                               | Long term outcomes                  | Intervention design/content              | 90      | <p>If the CP role is endogenous to the practice, and the research team facilitate setting up the model within the practice but do not provide the workers to carry out the model, <i>then</i> the changes brought about by the intervention do not collapse when the research project ends.</p> <p>Whereas,</p> <p>If new workers are added to test an intervention then this is artificial; you are measuring or studying a situation that is not sustaining, so it is best to use existing staff</p> | 155    | If the case worker role is endogenous to the practice, and the research team facilitate setting up the model within the practice but do not provide the workers to carry out the model, <i>then</i> the changes brought about by the intervention do not collapse when the research project ends | key leader, 7              |
|                                                                               | Long-term outcome                   | Organisational                           |         |                                                                                                                                                                                                                                                                                                                                                                                                                                                                                                        | 203    | If new workers are added to test an intervention then this is artificial; you are measuring or studying a situation that is not sustaining, so it is best to use existing staff                                                                                                                  | key leader, 7              |
|                                                                               | Long term outcomes                  | Organisational: Leader by-in, knowledge  | 91      | <p>(If starting a pilot, then it's possible to work bottom up without gaining structural/political support).</p> <p>If risks are understood and taken on at high level in organisation, then it's more likely that a model will be scaled up and sustainable.</p>                                                                                                                                                                                                                                      | 241    | If risks are understood and taken on at high level in organisation, then it's more likely that a model will be scaled up and sustainable.                                                                                                                                                        | key leader, 7              |
|                                                                               | Fidelity to the model: facilitators | Researchers support to organisation      | 92      | If, during the intervention, a change in service circumstance becomes apparent, then it may be necessary for the researchers to assertively seek Trust support for PARTNERS in order to maintain fidelity to the model                                                                                                                                                                                                                                                                                 | 210    | If, during the intervention, a change in service circumstance becomes apparent, then it may be necessary for the researchers to assertively seek Trust support for PARTNERS                                                                                                                      | key leader, 7              |

| Macro/Meso/Micro level | Outcome ( <i>then</i> ) category                  | Context/Mechanism ( <i>if</i> ) category   | CES No. | Consolidated Candidate Theory                                                                                                                                                                                                                                                                                                                                                                                                                                                                          | ES No. | ESs                                                                                                                                                                                                                       | stakeholder, source number |
|------------------------|---------------------------------------------------|--------------------------------------------|---------|--------------------------------------------------------------------------------------------------------------------------------------------------------------------------------------------------------------------------------------------------------------------------------------------------------------------------------------------------------------------------------------------------------------------------------------------------------------------------------------------------------|--------|---------------------------------------------------------------------------------------------------------------------------------------------------------------------------------------------------------------------------|----------------------------|
|                        | Fidelity to the model: facilitators               | Intervention set up, engaging stakeholders | 93      | <p><i>If</i> researchers, in implementing PARTNERS in primary care,</p> <p>Target surgeries with an interest in mental health,</p> <p>Take time for planning and relationship building, for example explore the local culture in order to think about how to link into its synergies; respect the wider team including GPs, practice managers, nurses and receptionists; and involve them all in understanding the model of care,</p> <p><i>Then</i> there should be fewer implementation barriers</p> | 236    | If implementation takes time with planning and relationship building and if this is factored in, then it is more likely to be successful                                                                                  | key leader, 7              |
|                        | Fidelity to the model: facilitators               | Intervention set up, engaging stakeholders |         |                                                                                                                                                                                                                                                                                                                                                                                                                                                                                                        | 248    | If receptionists feel respected and involved in a model of care, then they will both contribute directly through use of their interpersonal skills and indirectly provide support for project to practice manager and GPs | key leader, 7              |
|                        | Fidelity to the model: facilitators               | Intervention set up, engaging stakeholders |         |                                                                                                                                                                                                                                                                                                                                                                                                                                                                                                        | 282    | <i>If</i> the intervention is targeted at GPs/practices with an interest in mental health <i>then</i> it is more likely to be delivered                                                                                   | key leader, 7              |
|                        | Fidelity to the model: facilitators               | Intervention set up, engaging stakeholders |         |                                                                                                                                                                                                                                                                                                                                                                                                                                                                                                        | 314    | <i>If</i> practices are aware of the principles of collaborative care <i>then</i> there should be fewer implementation barriers.                                                                                          | key leader, 7              |
|                        | Fidelity to the model: facilitators               | Intervention set up, engaging stakeholders |         |                                                                                                                                                                                                                                                                                                                                                                                                                                                                                                        | 314    | <i>If</i> practices have a particular culture <i>then</i> linking into the synergies of this culture is important for the implementation of collaborative care                                                            | key leader, 7              |
|                        | Fidelity to the model: barriers                   | Intervention set up, engaging stakeholders |         |                                                                                                                                                                                                                                                                                                                                                                                                                                                                                                        | 344    | <i>If</i> primary care providers are provided with important information and education about the P2 cohort <i>then</i> this alone will not make much of a difference to the care provided.                                | key leader, 7              |
|                        | Fidelity to the model/effectiveness: facilitators | Organisational change                      | 94      | <p><i>If</i> problems related to health system changes such as leadership, staff and service delivery are overcome, for example,</p> <p>care providers connect together appropriately,</p>                                                                                                                                                                                                                                                                                                             | 318    | <i>If</i> collaborative care rather than regular/traditional mental health care is to be achieved <i>then</i> care providers need to connect together appropriately.                                                      | key leader, 7              |

| Macro/Meso/Micro level | Outcome ( <i>then</i> ) category    | Context/Mechanism ( <i>if</i> ) category | CES No. | Consolidated Candidate Theory                                                                                                                                                                                                                                                                                                                                                                                                                                                                                                                                                                                                                                                                                       | ES No. | ESs                                                                                                                                                                                    | stakeholder, source number |
|------------------------|-------------------------------------|------------------------------------------|---------|---------------------------------------------------------------------------------------------------------------------------------------------------------------------------------------------------------------------------------------------------------------------------------------------------------------------------------------------------------------------------------------------------------------------------------------------------------------------------------------------------------------------------------------------------------------------------------------------------------------------------------------------------------------------------------------------------------------------|--------|----------------------------------------------------------------------------------------------------------------------------------------------------------------------------------------|----------------------------|
|                        |                                     |                                          |         | It is stressed that P2 will be looking at ways to help practitioners use their time more efficiently whilst improving health outcomes,<br><br>and/or clear incentives of the intervention are communicated to practitioners,<br><br><i>Then</i> collaborative care will be implemented.                                                                                                                                                                                                                                                                                                                                                                                                                             |        |                                                                                                                                                                                        |                            |
|                        | Fidelity to the model: facilitators | Support for Organisational change        |         |                                                                                                                                                                                                                                                                                                                                                                                                                                                                                                                                                                                                                                                                                                                     | 346    | <i>If</i> collaborative care is implemented <i>Then</i> problems related to health systems changes such as leadership, staff and service delivery will most likely need to be overcome | key leader, 7              |
|                        | Fidelity to the model: facilitators | Support for Organisational change        |         |                                                                                                                                                                                                                                                                                                                                                                                                                                                                                                                                                                                                                                                                                                                     | 337    | <i>If</i> the organisational barriers related to the time available in the current climate of NHS care are to be overcome <i>then</i>                                                  | key leader, 7              |
|                        | Fidelity to the model: facilitators | Support for Organisational change        |         |                                                                                                                                                                                                                                                                                                                                                                                                                                                                                                                                                                                                                                                                                                                     | 275    | <i>If there are clear incentives then it will be easier to introduce the new paperwork and inter-professional communication required for regular and systematic monitoring</i>         |                            |
|                        | Effectiveness: facilitators         | Record keeping: communication            | 95      | If the following facilitators are present:<br><br>There is an appropriate supportive context (across training, organisations etc..) for all those contributing to the intervention to be able to co-construct appropriate care,<br><br>Professionals are aware of relevant information about service users in primary care records and through informal communication cultures, such as appropriate mental health contact information and progress information including key goal/s for the individual service user, and the professionals align appropriately behind the individual as they (service user) complete the actual work towards these goal/s,<br><br>Then the PARTNERS intervention will be effective. | 329    | <i>If</i> P2 is to work effectively <i>then</i> GPs need to be able to see appropriate mental health contact information and progress notes in service user,s primary care records.    | key leader, 7              |

| Macro/Meso/Micro level | Outcome ( <i>then</i> ) category                  | Context/Mechanism ( <i>if</i> ) category                        | CES No. | Consolidated Candidate Theory                                                                                          | ES No. | ESs                                                                                                                                                                                                                                                                                                                                                                                     | stakeholder, source number |
|------------------------|---------------------------------------------------|-----------------------------------------------------------------|---------|------------------------------------------------------------------------------------------------------------------------|--------|-----------------------------------------------------------------------------------------------------------------------------------------------------------------------------------------------------------------------------------------------------------------------------------------------------------------------------------------------------------------------------------------|----------------------------|
|                        | Effectiveness: facilitators                       | Cross practitioner focus on goals                               |         |                                                                                                                        | 348    | <i>If</i> P2 is to work effectively <i>then</i> all professionals need to be fully aware of the key goal/s for the individual service user with the intervention, training, monitoring, recovery and multi-professional communication centred on it.                                                                                                                                    | key leader, 7              |
|                        | Effectiveness: facilitators                       | Use of resources to support SU goals                            |         |                                                                                                                        | 349    | <i>If</i> P2 is to work effectively <i>then</i> a whole range of resources need to align around the goals and wants of the individual service user. This involves the family, voluntary services and key professional such as the GP & Psychiatrists aligning appropriately behind the individual as they (service user) complete the actual work with appropriate support as required. | key leader, 7              |
|                        | Effectiveness: facilitators                       | Organisational support                                          |         |                                                                                                                        | 350    | <i>If</i> better outcomes are to be achieved through P2 <i>then</i> there needs to be an appropriate supportive context (across training, organisations etc..) and layers of support for all those contributing to the care intervention in order that they can co-construct appropriate care.                                                                                          | key leader, 7              |
|                        | Effectiveness: facilitators                       | Organisatioanl support / culture: formal and informal           |         |                                                                                                                        | 354    | <i>If</i> P2 is to work effectively <i>then</i> there needs to be both an appropriate formal infrastructure (training, system adaptation, supervision) and appropriate informal communication culture. This will allow for appropriate information to be shared and the creation of a shared understanding around service users. [also in practitioner—practitioner interactions]       | key leader, 7              |
|                        | Effectiveness: facilitators                       | Support for CP<br><br>CP-GP and other practitioner interactions |         |                                                                                                                        | 317    | <i>If</i> the P2 intervention is to be successful <i>then</i> it is crucial that the CP is trained/supported to work in a collaborative joined up way with GPs, other services and the whole system rather than with the service user individually and exclusively. Central to this is the re-engagement with GPs.                                                                      | key leader, 7              |
|                        | Fidelity to the model: barriers                   | Service relationships / communication                           |         |                                                                                                                        | 215    | <i>If</i> primary and secondary care do not share information freely, then this could be a barrier to implementing PARTNERS –                                                                                                                                                                                                                                                           | key leader, 7              |
|                        | Fidelity to the model/effectiveness: facilitators | Support to supervisors                                          | 96      | <i>If</i> supervision structures are highlighted and communicated as systemically different to current CMHT practices, | 334    | <i>If</i> optimal clinical care is to be provided whilst a level of fidelity with the study protocol is maintained <i>then</i> support and advice for supervisors is crucial to ensure that appropriate patient centred decisions are made.                                                                                                                                             | key leader, 7              |

| Macro/Meso/Micro level | Outcome ( <i>then</i> ) category    | Context/Mechanism ( <i>if</i> ) category   | CES No. | Consolidated Candidate Theory                                                                                                                                                                                                                                                                                                                                                                                                                                                                                                                                                                                                                                                                                                                                                           | ES No. | ESs                                                                                                                                                                                                                                                                                                                                                                            | stakeholder, source number |
|------------------------|-------------------------------------|--------------------------------------------|---------|-----------------------------------------------------------------------------------------------------------------------------------------------------------------------------------------------------------------------------------------------------------------------------------------------------------------------------------------------------------------------------------------------------------------------------------------------------------------------------------------------------------------------------------------------------------------------------------------------------------------------------------------------------------------------------------------------------------------------------------------------------------------------------------------|--------|--------------------------------------------------------------------------------------------------------------------------------------------------------------------------------------------------------------------------------------------------------------------------------------------------------------------------------------------------------------------------------|----------------------------|
|                        |                                     |                                            |         | <p>support and advice for supervisors (including from the research team where appropriate) is given to ensure that they can oversee appropriate patient centred decisions with CPs,</p> <p>Supervisors oversee and monitor care partner's delivery of care using supervision protocols, particularly ensuring focus across the whole intervention population/cohort, as well as proactive follow up of service users who may be disengaging with services,</p> <p>Supervisors not only support CPs, giving them information and advice about how to handle difficult situations, but also appropriately challenge them to deliver high quality of care,</p> <p><i>Then</i> optimal clinical care will be provided whilst a level of fidelity with the study protocol is maintained.</p> |        |                                                                                                                                                                                                                                                                                                                                                                                |                            |
|                        | Fidelity to the model: facilitators | Support for supervisors                    |         |                                                                                                                                                                                                                                                                                                                                                                                                                                                                                                                                                                                                                                                                                                                                                                                         | 333    | <i>If</i> and when the P2 intervention throws up important issues for supervisors during the formative stages of the intervention <i>then</i> appropriate support and clinical contact from P2 researchers who have been involved in developing the protocol is important.                                                                                                     | key leader, 7              |
|                        | Fidelity to the model: facilitators | Changes to practice, including supervision |         |                                                                                                                                                                                                                                                                                                                                                                                                                                                                                                                                                                                                                                                                                                                                                                                         | 336    | <i>If</i> appropriate collaborative care is to be achieved <i>then it</i> is important that assertive systemic ways of following up and linking people together along with different supervision structures are highlighted and communicated as systemically different to current CMHT practices that may be inappropriately described by practitioners as collaborative care. | key leader, 7              |
|                        | Fidelity to the model: facilitators | supervision                                |         |                                                                                                                                                                                                                                                                                                                                                                                                                                                                                                                                                                                                                                                                                                                                                                                         | 324    | <i>If</i> CPs are to deliver the P2 intervention appropriately and as protocolised <i>then</i> supervision that oversees their delivery of care is crucial . This will ensure they don't deliver non-protocolised or inappropriate advice or mental health intervention.                                                                                                       | key leader, 7              |

| Macro/Meso/Micro level | Outcome ( <i>then</i> ) category    | Context/Mechanism ( <i>if</i> ) category | CES No. | Consolidated Candidate Theory | ES No. | ESs                                                                                                                                                                                                                                                                                                                                                                 | stakeholder, source number |
|------------------------|-------------------------------------|------------------------------------------|---------|-------------------------------|--------|---------------------------------------------------------------------------------------------------------------------------------------------------------------------------------------------------------------------------------------------------------------------------------------------------------------------------------------------------------------------|----------------------------|
|                        | Fidelity to the model: facilitators | supervision                              |         |                               | 319    | <i>If</i> collaborative care is to be achieved <i>then</i> actively engaged supervision between CPs and supervisors rather than traditional CMHT supervision is crucially important.                                                                                                                                                                                | key leader, 7              |
|                        | Fidelity to the model: facilitators | Supervision protocols                    |         |                               | 304    | <i>If</i> the P2 team want to ensure that a collaborative models does not go “off the rails” <i>Then</i> clear structured supervision protocols focussed across the whole intervention population/cohort, and in particular difficult/unsuccessful groups rather than individual success stories or narratives for successful groups, needs to be in place.         | key leader, 7              |
|                        | Fidelity to the model: facilitators | Supervision / support for supervisors    |         |                               | 171    | If supervisors are adequately trained to a criterion,<br><br>And<br><br>If supervisors monitor the practice of CPs in the long run, Then The CPs are more likely to practice according to that criterion                                                                                                                                                            | key leader, 7              |
|                        | Effectiveness: facilitators         | Supervision                              |         |                               | 211    | If supervisors not only support CPs, giving them information and advice about how to Handle difficult situations, but also challenge them to deliver high quality of care, then the intervention outcome will be optimal. (RG-J ? -is there additional theory needed here to address being demotivated by criticism? In other words, if challenged inappropriately? | key leader, 7              |
|                        | Effectiveness: facilitators         | Support for CP<br><br>CP behaviour       |         |                               | 315    | <i>If</i> the P2 intervention is to be delivered effectively <i>then</i> a well supervised CP who actually makes the intervention take place, ensures that people are being followed up and connects them to the things they need to move forward is the key component                                                                                              |                            |
|                        | Effectiveness: facilitators         | Support for CP<br><br>CP-SU interactions |         |                               | 316    | <i>If</i> the P2 intervention is to be successful <i>then</i> it is crucial that the CP is trained/supported (JA – from interview this includes supervision) to think differently in how they proactively and assertively follow up service users who may be disengaging with services.                                                                             | key leader, 7              |

| Macro/Meso/Micro level | Outcome ( <i>then</i> ) category                  | Context/Mechanism ( <i>if</i> ) category | CES No. | Consolidated Candidate Theory                                                                                                                                                                                                                                                                                                                                                                                                                                                                                                                                                                     | ES No. | ESs                                                                                                                                                                                             | stakeholder, source number |
|------------------------|---------------------------------------------------|------------------------------------------|---------|---------------------------------------------------------------------------------------------------------------------------------------------------------------------------------------------------------------------------------------------------------------------------------------------------------------------------------------------------------------------------------------------------------------------------------------------------------------------------------------------------------------------------------------------------------------------------------------------------|--------|-------------------------------------------------------------------------------------------------------------------------------------------------------------------------------------------------|----------------------------|
|                        | Fidelity to the model: barriers                   | CP behaviour / training                  |         |                                                                                                                                                                                                                                                                                                                                                                                                                                                                                                                                                                                                   | 205    | If CPs respond positively to intervention training, then this does not necessarily mean they will implement the intervention according to the manual                                            | key leader, 7              |
|                        | Fidelity to the model/Effectiveness: facilitators | Organisational support for CP            | 97      | <p><i>If</i> organisational, information sharing and governance structures support PARTNERS and communicate to CPs that PARTNERS is normal routine practice,</p> <p>and</p> <p>CPs have access to technical assistance so that they can draw on to navigate around barriers to implementation of organisational level factors,</p> <p>and</p> <p>the CP is given fewer, prioritised tasks, for example they focus specifically on the individuals they are supporting rather than organisational requirements and restrictions,</p> <p><i>Then</i> fidelity to the model will be facilitated.</p> | 352    | <i>If</i> CPs are to deliver P2 effectively <i>then</i> organisational, information sharing and governance structures must communicate that is normal routine practice.                         | key leader, 7              |
|                        | Effectiveness: barriers                           | Organisational support to CPs            |         |                                                                                                                                                                                                                                                                                                                                                                                                                                                                                                                                                                                                   | 209    | If Trust managers do not support CPs to spend their time on PARTNERS, then this could act as a barrier to the intervention resulting in its expected outcomes                                   | key leader, 7              |
|                        | Fidelity to the model: facilitators               | Organisational support for CP            |         |                                                                                                                                                                                                                                                                                                                                                                                                                                                                                                                                                                                                   | 353    | <i>If</i> practitioners are to be released from organisational constraints to deliver P2 in the right way <i>then</i> a multistage outer ring of organisational behavioural change is necessary | key leader, 7              |
|                        | Fidelity to the model: facilitators               | Organisational support                   |         |                                                                                                                                                                                                                                                                                                                                                                                                                                                                                                                                                                                                   | 338    | <i>If</i> P2 is to work as an intervention <i>then</i> it is crucial that senior management and senior individuals in healthcare organisations are fully supportive of the study.               | key leader, 7              |

| Macro/Meso/Micro level | Outcome ( <i>then</i> ) category    | Context/Mechanism ( <i>if</i> ) category  | CES No. | Consolidated Candidate Theory                                                                                                                                                                                                                                                        | ES No. | ESs                                                                                                                                                                                                   | stakeholder, source number |
|------------------------|-------------------------------------|-------------------------------------------|---------|--------------------------------------------------------------------------------------------------------------------------------------------------------------------------------------------------------------------------------------------------------------------------------------|--------|-------------------------------------------------------------------------------------------------------------------------------------------------------------------------------------------------------|----------------------------|
|                        | Fidelity to the model: facilitators | (Technical)organisational support for CPs |         |                                                                                                                                                                                                                                                                                      | 174    | If CPs have access to technical assistance, then if they face barriers to implementation around organisational level factors they can access support and ideas for navigating around such barriers    | key leader, 7              |
|                        | Fidelity to the model: facilitators | Organisational support for CP             |         |                                                                                                                                                                                                                                                                                      | 283    | <i>If</i> the case manager is given fewer rather than more tasks <i>then</i> they are more likely to do what they've been asked to do                                                                 |                            |
|                        | Fidelity to the model: facilitators | CP behaviour, organisational support      |         |                                                                                                                                                                                                                                                                                      | 359    | <i>If</i> P2 is to be delivered effectively <i>then</i> CPs and their team need to focus specifically on the individuals they are supporting rather than organisational requirements and restrictions | key leader, 7              |
|                        | Fidelity to the model: barriers     | Intervention design                       |         |                                                                                                                                                                                                                                                                                      | 214    | If there are too many components in PARTNERS, and our expectations for service change are too high, then this may act as a barrier to implementation                                                  | key leader, 7              |
|                        | Fidelity to the model: facilitators | CP training                               | 98      | <i>If</i> researchers provide quality training relevant to the intervention, including developing their knowledge of primary care where there may be gaps, then the CPs are more likely to practice with fidelity to the model                                                       | 327    | <i>If</i> CPs are to be able to deliver P2 <i>then</i> they may need to develop their knowledge of primary care and other areas where there may be gaps.                                              | key leader, 7              |
|                        | Fidelity to the model: barriers     | training                                  |         |                                                                                                                                                                                                                                                                                      | 179    | If trainers do not provide quality training relevant to the intervention, for example by involving past CPs and supervisors in future CP training, then this is a significant barrier to fidelity     | key leader, 7              |
|                        | Effectiveness (CP)                  | CP skills                                 | 99      | If CPs are hired not only in response to previous experience (nurse, social worker, peer worker) but also due to individual characteristics, for example non-confrontational, proactive advocacy with GPs; sensitive, appropriately challenging support with SUs; and the ability to | 340    | <i>If</i> a CP is to be effective <i>then</i> it is not just about their type of past experience/job title (nurse, social worker, peer worker) but also their individual ability in this role.        | key leader, 7              |

| Macro/Meso/Micro level | Outcome ( <i>then</i> ) category    | Context/Mechanism ( <i>if</i> ) category | CES No. | Consolidated Candidate Theory                                                                                                                                                                                                                                          | ES No. | ESs                                                                                                                                                                                                                                                           | stakeholder, source number |
|------------------------|-------------------------------------|------------------------------------------|---------|------------------------------------------------------------------------------------------------------------------------------------------------------------------------------------------------------------------------------------------------------------------------|--------|---------------------------------------------------------------------------------------------------------------------------------------------------------------------------------------------------------------------------------------------------------------|----------------------------|
|                        |                                     |                                          |         | problem solve, then a CP is likely to be effective                                                                                                                                                                                                                     |        |                                                                                                                                                                                                                                                               |                            |
|                        | Effectiveness (CP)                  | CP skills                                |         |                                                                                                                                                                                                                                                                        | 341    | <i>If</i> a case manager is to be effective <i>then</i> they need to be proactive and able to problem solve in ways that are not necessarily taught through professional training.                                                                            | key leader, 7              |
|                        | Fidelity to the model: facilitators | CP skills                                |         |                                                                                                                                                                                                                                                                        | 183    | If CPs have highly developed interpersonal skills, and are able to respond appropriately to both GPs (advocating non-confrontationally) and SUs (sensitive, listening, supportive, appropriately challenging) then this best supports the aims of P2.         | key leader, 7              |
|                        | Fidelity to the model: barriers     | CP GP interactions                       |         |                                                                                                                                                                                                                                                                        | 182    | If CPs are reluctant to talk to GPs then this could be a substantial barrier to effective multi-professional working                                                                                                                                          | key leader, 7              |
|                        | Fidelity to the model: barriers     | CP behaviour                             |         |                                                                                                                                                                                                                                                                        | 196    | If CPs say they will implement PARTNERS according to the manual but do not do so, then this can be a crucial barrier to the intervention working as expected (JA this was discussed as being about honesty = not sure what to do about this one)              | key leader, 7              |
|                        | Intervention design / content       | Evidence base                            | 100     | <i>If</i> a key long or short term motivational goal is identified with a service user <i>then</i> the tensions between a patient-centred approach and a protocol/evidence driven approach <u>may be overcome through ongoing, trustful and flexible relationships</u> | 274    | If you focus on evidence based guidelines then you will not achieve individualised care                                                                                                                                                                       | key leader, 7              |
|                        | Intervention design / content       | Working with, not working on SUs         |         |                                                                                                                                                                                                                                                                        | 305    | <i>If</i> a key long or short term motivational goal is identified with a service user <i>then</i> the tensions between a patient-centred approach and a protocol driven approach <u>may be overcome through ongoing, trustful and flexible relationships</u> | key leader, 7              |

| Macro/Meso/Micro level | Outcome ( <i>then</i> ) category                     | Context/Mechanism ( <i>if</i> ) category | CES No. | Consolidated Candidate Theory                                                                                                                                                                                                                                                                                                                        | ES No. | ESs                                                                                                                                                                                                                                                                                                                                              | stakeholder, source number |
|------------------------|------------------------------------------------------|------------------------------------------|---------|------------------------------------------------------------------------------------------------------------------------------------------------------------------------------------------------------------------------------------------------------------------------------------------------------------------------------------------------------|--------|--------------------------------------------------------------------------------------------------------------------------------------------------------------------------------------------------------------------------------------------------------------------------------------------------------------------------------------------------|----------------------------|
|                        | Fidelity to the model: facilitators                  | Intervention design                      |         |                                                                                                                                                                                                                                                                                                                                                      | 271    | If the service user is part of the team then collaborative care can be delivered                                                                                                                                                                                                                                                                 | key leader, 7              |
|                        | Intervention design                                  | Access                                   | 101     | If service users stay under review and/or are able to access professional services as needed, then the chance of relapse is reduced, and they will be able to continue with everyday life despite ongoing symptoms.                                                                                                                                  | S135   | <i>If</i> service users are able to access professional services as needed, <i>then</i> they will be able to continue with everyday life despite ongoing symptoms                                                                                                                                                                                | SU, 1                      |
|                        | Intervention design                                  | Remain under review                      |         |                                                                                                                                                                                                                                                                                                                                                      | 254    | If people stay under review rather than being discharged from all specialist follow up, then the chance of relapse is reduced.                                                                                                                                                                                                                   | key leader, 7              |
|                        | Fidelity to the model: facilitators                  | Methods                                  | 102     | If training for CPs and meetings between CPs-SUs are audio recorded, then a more accurate record is maintained and closer adherence to the intervention protocol and theory more likely.                                                                                                                                                             | 325    | If meetings between CPs and service users are recorded, then CPs are more likely to follow the intervention protocol appropriately and the fidelity of the intervention is more likely to be established                                                                                                                                         | key leader, 7              |
|                        | Fidelity to the model: facilitators                  | Methods                                  |         |                                                                                                                                                                                                                                                                                                                                                      | 206    | If fidelity is recorded by a third party or a recording, then this can create a more accurate record                                                                                                                                                                                                                                             | key leader, 7              |
|                        | Fidelity to the model: facilitators                  | Methods                                  |         |                                                                                                                                                                                                                                                                                                                                                      | 308    | <i>If</i> training sessions with case managers/therapist are recorded <i>then</i> poor adherence to intervention theory may be reduced.                                                                                                                                                                                                          | key leader, 7              |
|                        | Process evaluation: Evaluation of use of GP benefits | Organisation: Care Partner role          | 103     | If CPs are responsible for engaging, retaining, monitoring and recording data on primary care systems according to the P2 manual, then GPs are recipients of an external service<br><br>If GPs are recipients of the benefits of P2 more than implementers, then evaluation of the intervention should involve monitoring how GPs use these benefits | 189    | If CPs are responsible for engaging, retaining, monitoring and recording data on primary care systems according to the P2 manual, then GPs are recipients of an external service<br>If GPs are recipients of the benefits of P2 more than implementers, then evaluation of the intervention should involve monitoring how GPs use these benefits | key leader, 7              |
|                        | Process evaluation: evaluation of CP learning        | Focus of process evaluation              | 104     | If process evaluation explores learning processes only during training or in relation to the manual or during supervision, then                                                                                                                                                                                                                      | 211    | If process evaluation explores learning processes only during training or in relation to the manual or during supervision, then important aspects are likely to be missed as much learning occurs on the job                                                                                                                                     | key leader, 7              |

| Macro/Meso/Micro level                         | Outcome ( <i>then</i> ) category            | Context/Mechanism ( <i>if</i> ) category | CES No. | Consolidated Candidate Theory                                                                                                                                                                                                                                                                                                                   | ES No. | ESs                                                                                                                                                                                                      | stakeholder, source number |
|------------------------------------------------|---------------------------------------------|------------------------------------------|---------|-------------------------------------------------------------------------------------------------------------------------------------------------------------------------------------------------------------------------------------------------------------------------------------------------------------------------------------------------|--------|----------------------------------------------------------------------------------------------------------------------------------------------------------------------------------------------------------|----------------------------|
|                                                |                                             |                                          |         | important aspects are likely to be missed as much learning occurs on the job                                                                                                                                                                                                                                                                    |        |                                                                                                                                                                                                          |                            |
|                                                | Outcome measures                            | Type of measure                          | 105     | If certain patient focussed measures/assessments and outcomes are used for P2 -such as those relating to recovery, symptoms, functioning, quality of life or practice change- then these issues are likely to remain prominent, wider discussions around these areas may be driven forward and care may be directed to deficits in these areas. | 160    | If assessments relevant to recovery are used in collaborative care trials, then this helps aspects of personal recovery to remain prominent in the intervention                                          | key leader, 7              |
|                                                | Outcome measures                            | Type of measure                          |         |                                                                                                                                                                                                                                                                                                                                                 | 263b   | If outcomes for the trialled intervention are chosen around areas of practice change, then these outcomes can be a means to drive wider discussions forward [NB edited from the original and renumbered] | key leader, 7              |
|                                                | Outcome measures                            | Type of measure                          |         |                                                                                                                                                                                                                                                                                                                                                 | 225    | [reverse]<br>If measures of symptoms, functioning and quality of life that are valid (and relevant) are used to monitor outcomes over time, then (care will be more directed to deficits that matter).   | key leader, 7              |
| 9. carer perceptions, understanding and skills |                                             |                                          |         |                                                                                                                                                                                                                                                                                                                                                 |        |                                                                                                                                                                                                          |                            |
|                                                | Carer perceptions, understanding and skills | Information                              | 106     | If carers and family members:<br><br>develop coaching attitudes and skills,<br><br>communicate the potential for recovery,<br><br>and/or are involved in transitions and stepping down,<br><br>then they will be more likely to support SUs and be less anxious, and/or<br><br>SUs are more likely to engage in constructive action.            | S86    | If carers and family members develop coaching attitudes and skills, then their capacity to be appropriately supportive would increase                                                                    | practitioners, 2           |

| Macro/Meso/Micro level | Outcome ( <i>then</i> ) category                      | Context/Mechanism ( <i>if</i> ) category | CES No. | Consolidated Candidate Theory | ES No. | ESs                                                                                                                                                                                   | stakeholder, source number       |
|------------------------|-------------------------------------------------------|------------------------------------------|---------|-------------------------------|--------|---------------------------------------------------------------------------------------------------------------------------------------------------------------------------------------|----------------------------------|
|                        | Carer perceptions, understanding and skills           | Carer involvement                        |         |                               | 262    | If carers are involved in transitions and stepping down, then they will be more likely to support and be less anxious.                                                                | key leader, 7                    |
|                        | Carer perceptions: Endings                            | Practitioner—practitioner interactions   |         |                               | 261    | [Also in 4. And 6.]<br><br>If there is a hand over from old to new practitioner, then anxieties are reduced in anxious practitioners, carers and patients, as well as improving care. | key leader, 7                    |
|                        | SU empowerment, agency, confidence and/or self-belief | Coordination of care                     |         |                               | S5     | If practitioners, family and peers communicate the potential for recovery, then service users are more likely to engage in constructive action                                        | SU, 1<br><br>MH policy makers, 3 |
